## REVIEW

# Nanotechnology Safety Concerns Revisited

Stephan T. Stern<sup>1</sup> and Scott E. McNeil

*Nanotechnology Characterization Laboratory, Advanced Technology Program, SAIC-Frederick, Inc., NCI-Frederick, Frederick, Maryland 21702*

Received April 12, 2007; accepted June 14, 2007

Nanotechnology is an emerging science involving manipulation of matter at the nanometer scale. Due to concerns over nanomaterial risks, there has been a dramatic increase in focused safety research. The present review provides a summary of these published findings, identifying areas of agreement and discordance with regard to: (1) the potential for nanomaterial exposure, (2) the relative hazard nanomaterials pose to humans and the environment, and (3) the present deficits in our understanding of risk. Special attention is paid to study design and methodologies, offering valuable insight into the complexities encountered with nanomaterial safety assessment. Recent data highlight the impact of surface characteristics on nanomaterial biocompatibility and point to the inadequacy of the current size-dependent mechanistic paradigms, with nanoscale materials lacking unique or characteristic toxicity profiles. The available data support the ability of the lung, gastrointestinal tract, and skin to act as a significant barrier to the systemic exposure of many nanomaterials. Furthermore, the acute systemic toxicity of many nanomaterials appear to be low. By contrast, the potential pulmonary toxicity of certain nanomaterials, such as carbon nanotubes, is significant, requiring a better understanding of exposure to further evaluate their risk. While these findings arrive at an overall picture of material-specific rather than nanogeneralized risk, any conclusions should clearly be tempered by the fact that nanomaterial safety data are limited. Until such time as the exposures, hazards, and environmental life cycle of nanomaterials have been more clearly defined, cautious development and implementation of nanotechnology is the most prudent course.

**Key Words:** nanotechnology; nanomaterials; nanoparticles; ultrafines; particle toxicology; safety evaluation.

Nanotechnology is an emerging science involving manipulation of matter at the nanometer scale. The recent rise in the interest surrounding nanotechnology stems from its

**Disclaimer:** The content of this publication does not necessarily reflect the views or policies of the Department of Health and Human Services, nor does mention of trade names, commercial products, or organizations imply endorsement by the U.S. Government.

<sup>1</sup> To whom correspondence should be addressed. E-mail: sternstephan@mail.nih.gov.

potential to revolutionize such diverse fields as engineering and medicine; for example, carbon nanotubes (CNTs) are being used in low-weight, high-strength building materials (Miyagawa *et al.*, 2005), while targeted nanoparticle drug formulations have been shown to greatly improve the toxicity profile of anticancer therapeutics in animal models (Kukowska-Latallo *et al.*, 2005). Along with the excitement over the prospects of nanotechnology, there have been increasing concerns regarding the risks this science may pose. As an example, a recent story in the international news described respiratory distress associated with the use of the German bathroom cleaner called Magic Nano (Weiss, 2006). The story was billed by some groups as an example of how nanotechnology is dangerous, and safeguards to protect the public and the environment from this emerging technology are not in place. Subsequent reports uncovered the fact that Magic Nano did not contain any nanoscale components, and the respiratory ailments associated with its use were likely due to the ethanol-water aerosol released when the cleaner was sprayed (Wolinsky, 2006). The Magic Nano story is a clear example of the need for accurate reporting and vetting of facts when it comes to nanotechnology. Most importantly, there is also a need for good science and public dissemination of findings to counter the negative perceptions that all too easily could result in the demise of this promising technology that is still in its infancy. The goal of this review is to objectively examine the current knowledgebase regarding the health risks posed by engineered nanoparticles, in order to put nanotechnology safety concerns in perspective.

Nanoparticles, the building blocks of nanotechnology, have been broadly defined as having at least one dimension at 100 nm or less. For biomedical application, this definition has been expanded to include particles greater than 100 nm, such as liposomes, in order to encompass particle sizes that take advantage of anatomical considerations, such as vascular gaps surrounding tumors (Garnett and Kallinteri, 2006). For the purposes of this review, nanoparticles can be categorized as either engineered or incidental depending on origin (Fig. 1). Engineered nanoparticles, such as the quantum dots and dendrimers (Fig. 1), are particles generated to exploit the

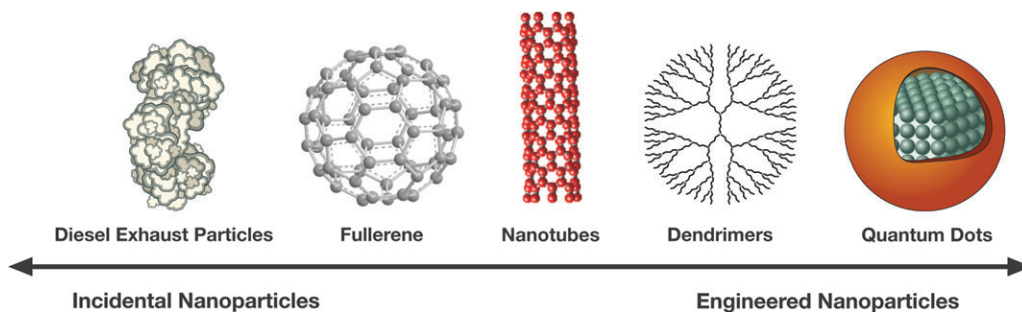

FIG. 1. Examples of incidental and engineered nanoparticles.

size-related properties inherent in the nanoscale (e.g., conductivity, spectral properties, biodistribution). Currently, there are many consumer products on the market that claim to have an engineered nanotechnology component. These products range from light-weight tennis rackets to stain-resistant clothing ([www.nanotechproject.org/consumerproducts](http://www.nanotechproject.org/consumerproducts)). Alternatively, incidental nanoparticles, such as diesel exhaust particles (Fig. 1), are defined as particles either from unintended anthropogenic sources (e.g., combustion derived) or of natural origin (e.g., particles generated in forest fires). Some particles, such as fullerenes and CNTs (Fig. 1), are both engineered materials and incidental components of air pollution.

The interaction of nanoparticles with humans and the environment is not a recent event. It is estimated that the average person consumes  $10^{12}$  submicron-sized particles per day in a normal diet as a result of food additives consisting primarily of titanium dioxide ( $\text{TiO}_2$ ) and aluminosilicates (Lomer *et al.*, 2002). Incidental nanoparticles are also found in such common sources as wood smoke, and automobile and furnace exhaust (Barregard *et al.*, 2006; Chang *et al.*, 2004; Fang *et al.*, 2005). Levels of incidental nanoparticles in the outdoor environment near heavy traffic areas can range from 5000 to 3,000,000 particles/ $\text{cm}^3$ ! (Uttell and Frampton, 2000). Correspondingly, the study of the hazardous effects of these particles, particulate toxicology, has been underway for many decades. Particle toxicology encompasses the study of various types of incidental nanoparticles, termed ultrafine particles, as well as toxic nanoscale mineral fibers (such as asbestos). Research into the health effects of these incidental nanoparticles has consisted of epidemiological studies and experimental studies in animal models. The mechanistic paradigms of particle toxicology have been used as the foundation for the emerging field of nanoparticle toxicology, coined “nanotoxicology” (Donaldson *et al.*, 2004).

### NANOPARTICLE RISK

Fundamentally, risk assessment involves an estimation of the potential for exposure and characterization of hazard. Potential

routes of nanoparticle exposure include inhalation, dermal, oral, and in the case of biomedical applications, parenteral (Fig. 2). Toxicity resulting from nanoparticle exposure could occur at the various portals of entry, such as the lungs and skin,

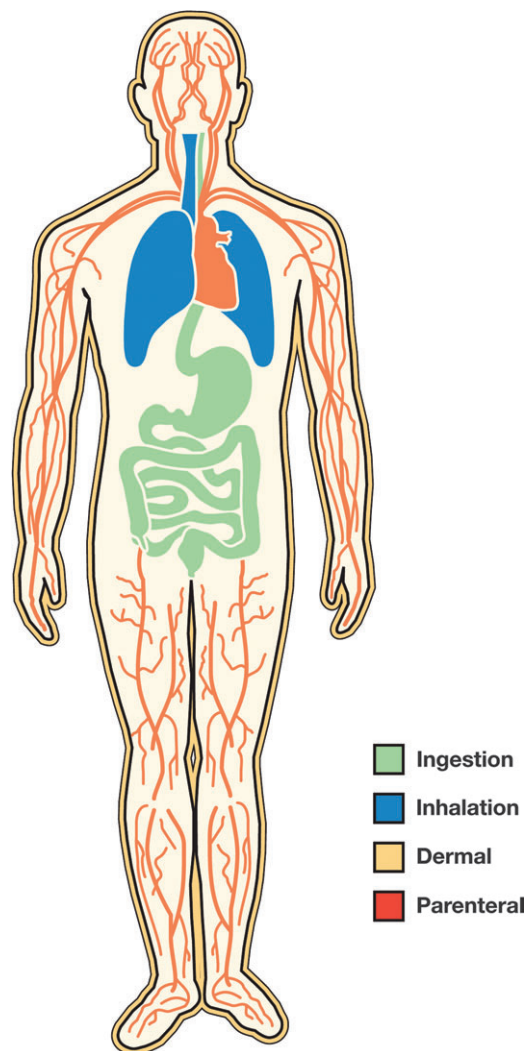

FIG. 2. Potential routes of nanoparticle exposure.

or at distant sites. For prediction of systemic toxicity following nonparenteral exposures, systemic dose is another important parameter to consider. The systemic dose is dependent upon both the barrier function and clearance mechanisms at the portals of entry. Studies addressing the systemic translocation of nanoparticles from sites of deposition are beginning to unravel the dynamics of nanoparticle–organism interaction, and provide the means to relate exposure and hazard data (Elder and Oberdorster, 2006).

## NANOPARTICLE EXPOSURE

Exposure to nanomaterials could occur during their development, manufacture, use, or following disposal. Presently, nanomaterial exposure studies are severely lacking. Considering nanomaterial-containing consumer products are presently on the market, this absence of exposure data represents a significant research need (Thomas *et al.*, 2006). Though the nanoscale components of these nanomaterial-containing consumer products are often bound to the material, and not in a free form, there is still potential for release of these materials during their wear. The following discussion of nanomaterial exposure highlights the limited exposure studies that have been conducted, as well as studies on the ability of the external surfaces of the body to limit systemic exposure and mechanisms of nanomaterial translocation.

### Inhalation Exposure

Inhalation is thought to be an important route of nanoparticle exposure, since nanoparticles can travel great distances in air by Brownian diffusion and are respirable, depositing within the alveolar regions of the lung (Bailey, 1994). In the case of engineered nanoparticles, very few airborne exposure studies have been conducted. Often a confounding factor in airborne nanoparticle exposure studies has been the high level of background incidental nanoparticles. For example, an occupational exposure study in an engine machining plant designed to measure the levels of airborne metalworking fluid mist, found that background incidental nanoparticles from direct-fire, natural gas furnace exhaust often exceeded those produced by the machining processes (Peters *et al.*, 2006b). In studies that were able to account for background incidental nanoparticles, airborne nanoparticle exposures have been found to be quite low. A study by Maynard *et al.* (2004), using an enclosed system to eliminate background, found the airborne mass concentration of CNT in a simulated production environment to be below  $53 \mu\text{g}/\text{m}^3$ . The majority of the particulates in the  $53 \mu\text{g}/\text{m}^3$  estimation were CNT agglomerates greater than  $1 \mu\text{m}$  in diameter, with many of these particulates not of respirable size. To put this level of CNT exposure in perspective, the level of background incidental particles resulting from entering and leaving the monitoring enclosure was as high as  $500 \mu\text{g}/\text{m}^3$ . Low nanoparticle exposures have

also been observed in a carbon black production facility (Kuhlbusch *et al.*, 2004). Airborne concentrations of nanoscale carbon black were undetectable during production hours, while microscale carbon black particles were observed. Nanoscale particulates that were present originated from forklift and gas heater emissions. These low-nanoscale CNT and carbon black exposures in a “worst-case” occupational setting are thought to be due to the tendency for airborne nanoparticles to agglomerate and dissipate as a result of sedimentation from the air (Kuhlbusch *et al.*, 2004; Maynard *et al.*, 2004).

The tendency for airborne nanoparticles to form larger particles, as a result of either particle agglomeration or condensation of vapors onto existing particles, has been noted for combustion-generated incidental nanoparticles from furnace and vehicle sources (Chang *et al.*, 2004; Sioutas *et al.*, 2005). Free-particle half-life has been shown to directly correlate with particle size and inversely correlate with particle concentration (Preining, 1998). This short airborne lifetime of free, non-agglomerated nanoparticles limits their inhalation exposure, since the agglomerated nanoparticle would be expected to deposit in the lungs as a larger particle in the upper airways, and with increasing size, agglomerated nanoparticles have an increased tendency to settle from the air. While the settling of the resulting larger nanoparticle agglomerates diminishes inhalation exposures, it may increase the potential for dermal exposure, and hand-to-mouth or object-to-mouth oral exposure, as discussed below. This natural tendency of nanoparticles in both air and liquid to agglomerate would be expected to limit dermal, oral, and inhalation exposure to free nanoscale particles. Nonetheless, regardless of this aggregation tendency, the various portals of entry would still be expected to encounter nanostructured aggregated particles of high surface areas, and these aggregated particles could still undergo disaggregation at these sites or within subcellular compartments. Additionally, surface coatings on engineered nanoparticles that limit particle–particle interaction and protein binding, such as the polyethylene glycol-coated surfaces of nanoparticles intended for biomedical application, would be expected to diminish this aggregation tendency.

### Systemic Translocation from Lung

Clearance mechanisms in the lungs include the mucociliary escalator and phagocytosis by alveolar macrophages. Several studies in rodents have also demonstrated that nanoparticles deposited in the lungs can translocate to the pulmonary interstitium (Oberdörster *et al.*, 1992; Oberdörster, 2000). In these studies it is important to take dose into account, as the fraction of the dose interstitialized has been shown to increase with increasing dose (Oberdörster *et al.*, 1992). Thus, the interstitialization of nanoparticles observed at high doses may not be relevant to normal exposure conditions. However, it is expected that, compared with rodents, humans would tend to interstitialize a greater proportion of an inhaled nanoparticle



dose in an equivalent exposure scenario (Nikula *et al.*, 1997). This movement of particles from the lung toward the circulation and secondary organs is of concern, since studies support a direct role for inhaled nanoparticles in systemic disease, such as cardiovascular disease. For example, CNTs have been shown to induce platelet aggregation *in vitro* and enhance thrombosis *in vivo* (Radomski *et al.*, 2005).

The results of studies examining the translocation of nanoparticles from the lungs to secondary organs are mixed, with some studies demonstrating translocation and others not. For instance, Kreyling *et al.* (2002) demonstrated that < 1% of the administered dose of 80- and 15 nm iridium particles translocated from the lungs of rats to liver, spleen, heart, and brain, and the extent of this translocation was greater for the smaller-sized particles. This study utilized tracheal instillation and was able to demonstrate that gastrointestinal (GI) absorption was not a likely route of the systemic exposure. A study examining the translocation of inhaled  $^{13}\text{C}$  nanoparticles (20–29 nm) in rats also observed translocation and hepatic distribution (Oberdörster *et al.*, 2002). However, in this study, it was difficult to control for the possible ingestion and GI absorption of nanoparticles, and the authors concluded that a significant portion of the observed systemically distributed nanoparticles was likely accounted for by this phenomenon. In contrast to findings supporting the systemic absorption of nanoparticles deposited in the respiratory tract, a study examining the translocation of technetium-99m-labeled carbon nanoparticles (60 nm) in humans failed to demonstrate distribution to secondary organs (Brown *et al.*, 2002). Overall, the available data suggest that the respiratory tract represents a formidable barrier to the systemic exposure of some nanoparticles.

### Neuronal Translocation

The ability of inhaled nanoparticles to undergo neuronal translocation from the nasal epithelium to the olfactory bulb is supported by several studies in rats (Elder *et al.*, 2006; Oberdörster *et al.*, 2004). Rat inhalation studies using 30 nm manganese oxide ( $\text{MnO}_2$ ) or 35 nm  $^{13}\text{C}$ -carbon particles, found elevated levels of Mn or  $^{13}\text{C}$ , in the olfactory bulb (Elder *et al.*, 2006; Oberdörster *et al.*, 2004). The fact that these cited studies measured the molecular constituents of the nanoparticles and not the nanoparticles themselves leaves open the possibility that distribution of the disassociated particles could have occurred instead of neuronal translocation of the intact nanoparticle. While these studies did attempt to account for the possibility of particle disassociation, studies examining the neuronal translocation of micron-sized  $\text{MnO}_2$  particles (Fechter *et al.*, 2002) far larger than the narrow (< 200 nm) diameter of the rat olfactory neurons (Plattig, 1989) suggest that a disassociation mechanism is also possible and requires consideration. A rat inhalation study utilizing 1.3- $\mu\text{m}$   $\text{MnO}_2$  particles found a significant increase in cortical Mn levels and a trend toward increased olfactory bulb Mn levels, which failed to reach

significance (Fechter *et al.*, 2002). Though the increase in olfactory bulb Mn levels found in this study was low and highly variable, and could conceivably have resulted from neuronal translocation of a nanoscale fraction within the larger, micron-sized population, there remains the possibility that particle disassociation was involved. Indeed, in the nanoscale  $\text{MnO}_2$  study of Elder *et al.* (2006) discussed above, Mn levels were also elevated in deeper regions of the central nervous system (CNS), including the frontal cortex, striatum, and cerebellum, and this increase was at least partially attributed to circulatory transport of ionic Mn.

Due to physiological and anatomical considerations, the nasal sensory nerve uptake of nanoparticles proposed in the rat model may not be predictive of human exposures: rats are obligatory nose breathers; 50% of their nasal mucosa is olfactory (vs. 5% in humans); and the weight of their olfactory bulb is approximately 177-fold greater than that of humans, when normalized to body weight (85 ng/0.2 kg rats vs. 168 ng/70 kg human) (Oberdörster *et al.*, 2005). In support of the relevance of the neuronal translocation pathway in man, non-human primate studies have also demonstrated olfactory bulb uptake of intranasally instilled 50-nm gold nanoparticles (de Lorenzo, 1970). Furthermore, the ability of nanosized particles to migrate via neuronal translocation in humans is supported by the known movements of viruses within nerves (Snyder *et al.*, 2006). Importantly, neuronal translocation via nasal sensory neurons is a potential route of nanoparticle CNS exposure in humans and, considering the predicted high deposition of nanosized particles in the nasopharyngeal region of the human respiratory tract (Bailey, 1994), it is reasonable to be concerned about the possible adverse effects that might arise from such exposure. Indeed, a recent *in vitro* study supports the ability of manganese nanoparticles to induce adverse effects in neuronal cells, including loss of cell viability, induction of oxidative stress, and dopamine depletion (Hussain *et al.*, 2006). Although CNS uptake of inhaled nanoparticles has yet to be proved in humans, the neuronal and circulatory translocation of inhaled incidental nanoparticles has been postulated to be involved in the etiology of neurodegenerative CNS diseases associated with airborne pollutants (Peters *et al.*, 2006a). Further research is required to provide direct evidence that the neuronal translocation mechanism of CNS uptake is operational in humans under normal nanoparticle exposure conditions, and that such translocation results in deleterious effects.

### Dermal Exposure

The interaction of nanoparticles with skin has received significant attention recently because of the increasing use of nanoscale particles in stain-resistant clothing, cosmetics, and sunscreens. The dermal route of exposure is also important because of the tendency of agglomerated airborne nanoparticles to settle on surfaces and the difficulties in preventing dermal contact with these settled particles. Several studies have been

conducted examining the ability of nanoscale TiO<sub>2</sub>, used as a ultraviolet (UV)-absorbing component in sunscreens, to penetrate the epidermis in human volunteers, and animal and *in vitro* models (Gamer *et al.*, 2006; Lademann *et al.*, 1999; Mavon *et al.*, 2007; Pflucker *et al.*, 2001; Schulz *et al.*, 2002). The primary TiO<sub>2</sub> particles used in these studies ranged in size from 10 to 60 nm, with larger sized aggregates present. In all of these studies, nanoparticles did not appear to penetrate past the stratum corneum of the epidermis, though in some cases, accumulation in the hair follicles was observed (for a recent review see Nohynek *et al.*, 2007). Studies have found 20 nm, negatively charged polystyrene spheres to behave similarly to nanoscale TiO<sub>2</sub> with regard to their follicular localization and lack of stratum corneum penetration (Alvarez-Roman *et al.*, 2004).

In contrast to the studies of nanoscale TiO<sub>2</sub> and polystyrene, a study examining the dermal penetration of quantum dots has shown limited dermal penetration (Ryman-Rasmussen *et al.*, 2006). This study by Ryman-Rasmussen *et al.* (2006) utilized scanning florescent confocal microscopy to examine the influence of size, shape, and surface charge on quantum dot penetration in an *in vitro*, flow-through diffusion porcine skin model. A small fraction of the applied dose for some quantum dot species was shown to penetrate the stratum corneum, with an even smaller fraction escaping the epidermis and accumulating within the dermis. This penetration was dependent upon size, shape, and surface charge of the quantum dots, with smaller, spherical particles demonstrating greater penetration than larger, ellipsoidal particles. None of the quantum dot species were shown to pass through the entire skin thickness to the opposing perfusate side of the diffusion cell. This limited dermal penetration has also been shown recently for < 10-nm maghemite and iron nanoparticles using an *in vitro* human skin model (Baroli *et al.*, 2007), suggesting that “smaller” nanoparticles may have this ability. Though studies have yet to examine the effect of skin condition on nanoparticle absorption, damaged skin would be expected to provide less of a barrier, and this issue may be important in certain situations, such as the application of nanoparticle-containing sunscreens to sun-damaged skin. In support of this idea, the flexing of skin *in vitro* has been shown to increase dermal penetration of micron-sized dextran particles and derivatized fullerenes (Rouse *et al.*, 2007; Tinkle *et al.*, 2003). Together, the available data suggest that healthy, intact skin is a significant barrier to certain nanomaterials.

### GI Exposure

Recent studies have addressed the issue of GI absorption of nanoparticles following oral exposure. Like dermal exposure, oral exposure could be a significant occupational and environmental route, resulting from ingestion of contaminated food and water, the swallowing of inhaled particles, or hand-to-mouth transfer of particles. Alternatively, nanoparticle drug formulations may be used to increase the oral bioavailability of

poorly soluble or labile drugs, or target GI lymphatic tissues (Florence and Hussain, 2001). While many nanoparticles have been shown to undergo limited GI absorption, mainly to lymphatics, most studies have demonstrated low systemic exposure following oral administration. For example, studies of the oral absorption of <sup>14</sup>C-radiolabeled fullerenes and <sup>192</sup>Ir nanoparticles in rats observed minimal systemic absorption (Kreyling *et al.*, 2002; Yamago *et al.*, 1995). The available data suggest that the absorption of nanoparticles from the GI tract is governed by both the size (Hillyer and Albrecht, 2001) and surface characteristics (Jani *et al.*, 1989) of the particle, with the smaller, hydrophobic, neutral particles having increased absorption (Hussain *et al.*, 2001). Absorption of <sup>125</sup>I-radiolabeled polystyrene nanoparticles in rats, for example, was found to be size dependent (50 nm > 100 nm > 300–3000 nm) and was mainly confined to the Peyer's patches of the gut associated lymphoid tissue (Jani *et al.*, 1990), which appears to be the predominant absorption pathway for nanoparticles from the gut.

## NANOPARTICLE HAZARD

Data regarding the hazard of nanomaterials have come mainly from epidemiological studies of pollution-derived incidental nanoparticles and limited experimental studies of both incidental and engineered nanomaterials, using both animal models and *in vitro* systems. Epidemiological studies support an association between particulate air pollutants and pulmonary, cardiovascular, and CNS disease (Calderon-Garciduenas *et al.*, 2002; Delfino *et al.*, 2005; Penttinen *et al.*, 2001; Peters *et al.*, 1997, 2006b). However, it is worth noting that in many epidemiological studies, the nanoparticle component of the particulate pollution was never specifically measured, and it was not possible to separate nanoparticle-related effects from the effects of larger particulates that were omnipresent. The nanoscale component of particulate air pollution has been implicated in the generation of these adverse effects, since nanoscale particles make up the greatest particle number concentrations and surface area of particulate air pollution, and nanoscale particles have greater lung deposition and potential for systemic translocation. The size fractions of particulate air pollution have also been shown to have different inflammatory, oxidative, and cytotoxic potencies in experimental systems (Jalava *et al.*, 2007; Li *et al.*, 2003).

### Hazard Assessment

The properties that make nanoparticles unique and drive the current interest in their industrial and biomedical application are the same properties that raise safety concerns. Nanoparticles have increased surface area for reactivity, and the potential for unique biodistribution governed by size (e.g., lung deposition) or protein interaction (e.g., opsonization). Nanoparticle properties (Fig. 3) that must be taken into account when assessing hazard include size, shape, agglomeration state,

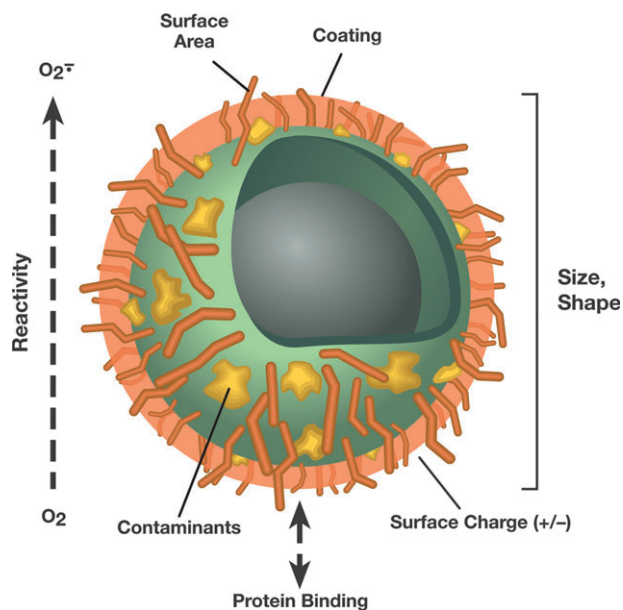

FIG. 3. Physicochemical properties of nanoparticles that may influence biocompatibility.

solubility, and surface properties (e.g., surface area, surface charge) (Patri *et al.*, 2007). It is fundamental to properly characterize these physicochemical properties, so that variables affecting biocompatibility can be identified and comparisons to other hazard studies can be made.

Due to their unique properties (e.g., large surface area for absorption of reagents, spectral properties, catalytic activity), nanoparticles also have the potential to interfere with hazard assessment assays. This interference can confound interpretation of toxicological studies, leading to “false-positive” or “false-negative” results. CNTs, for example, have been shown to interfere with the MTT cytotoxicity assay (Worle-Knirsch *et al.*, 2006) by absorbing the reduced formazan dye, resulting in an overestimation of cytotoxic potency. While it is likely that the majority of hazard assessment methods will be suitable for most nanomaterials, it is essential that assays first be validated. The use of multiple independent measures of hazard in order to confirm consensus behavior is also helpful.

When evaluating nanoparticle toxicology studies, it is important to note any experimental conditions that can influence interpretation of the data. Since nanoparticles have a tendency to aggregate, dispersive agents, such as surfactants, are often used to maintain the nanoscale or increase solubility. Studies that use dispersive agents may not be relevant to normal exposure conditions, since these dispersive agents, themselves, can have biological activity. Recently, an often-quoted study relating to the ability of fullerenes to induce oxidative stress in the brain of fish (Oberdörster, 2004) was called into question because of the possibility that residual tetrahydrofuran (THF) used to solubilize the nanoparticle resulted in the observed toxic mechanism (Andrievsky *et al.*,

2005). Follow-up studies demonstrated that the majority of the oxidative stress could be attributed to residual THF (Zhu *et al.*, 2006). Other experimental conditions that can affect assay outcome are light exposure, as some nanomaterials are photo-reactive (e.g., fullerenes; Rancan *et al.*, 2002), and serum proteins in cell culture media that can modulate agglomeration state (Tirado-Miranda *et al.*, 2003).

In many cases, the toxicities associated with nanoparticles have been attributed to contaminants that adsorb to the particle surface during their creation or transport, and not the nanomaterial itself. For instance, transition metal and redox active organic contaminants are thought to be responsible for the oxidative stress generated by particulate air pollutants. One study found oxidative stress generated in macrophages treated with nanoscale pollution particulates correlated with the organic contaminant content (Li *et al.*, 2003), and a subsequent study concluded that quinone and polyaromatic hydrocarbon contaminants were responsible for the mitochondrial dysfunction observed in macrophages treated with incidental diesel exhaust nanoparticles (Xia *et al.*, 2004). Since engineered nanomaterials are formed by controlled production processes, toxic contaminants, if present, could be removed from the final product. For example, nonpurified, iron-rich CNTs have been shown to be more potent in inducing oxidative stress in macrophages than purified CNTs with reduced iron content (Kagan *et al.*, 2006). Alternatively, coatings can be applied to engineered nanoparticles to make them more biocompatible. Surface coatings have been shown to dramatically influence the toxicity of nanoparticles. For instance, studies by Derfus *et al.* (2004) demonstrated that ZnS “capping” of CdSe quantum dots results in decreased toxicity to rat primary hepatocytes. Another study examining the effect of surface characteristics on quantum dot toxicity in human epidermal keratinocytes, found neutral, polyethylene glycol-coated quantum dots to be nontoxic, while amine surfaces were cytotoxic, and carboxylic surfaces were both cytotoxic and inflammatory (Ryman-Rasmussen *et al.*, 2007).

### Mechanistic Paradigms

Inflammation and oxidative stress have been identified as possible mechanisms underlying the etiology of nanoparticle-associated toxicities (Dick *et al.*, 2003; Donaldson and Stone, 2003; Xiao *et al.*, 2003). Nevertheless, it cannot be said that the ability to induce inflammation and oxidative stress are typical properties of nanomaterials in general. For instance, a screen of nanomaterials in a murine macrophage cell line (RAW 264.7) concluded that nanoscale TiO<sub>2</sub>, carbon black, and carboxylated polystyrene did not induce oxidative stress, while cationic polystyrene and incidental pollution-derived nanoparticles did (Xia *et al.*, 2006). Upregulation of inflammatory biomarkers was observed only in cells treated with the pollution-derived nanoparticles, and not with the cationic polystyrene particles. While the current inflammation and oxidative stress paradigms



provide a starting point for toxicological investigation of nanomaterials, it is still an attempt to generalize the mechanistic toxicology of an ever-increasingly diverse group of materials. The toxicity of cationic dendrimers, for example, appears to be related not to oxidative stress generation, but to disruption of cell membrane integrity through interaction of the positively charged dendrimer terminal groups and the anionic lipids composing the cell membrane (Mecke *et al.*, 2004). Likewise, the toxicity of cationic liposomes and polymers, under investigation as nonviral gene vectors, appears to be dependent upon charge considerations (Lv *et al.*, 2006).

### *Pulmonary Toxicity of Nanoparticles*

In several animal studies, shifts in the pulmonary toxicity dose–response relationships for nano- versus micron-sized particles have been observed. For example, a 3-month inhalation study found nanoscale TiO<sub>2</sub> to be more inflammatory than submicron-sized TiO<sub>2</sub> (Oberdörster *et al.*, 1994). When normalized to surface area, the dose–response curves for the nano- and submicron-sized TiO<sub>2</sub> particles in the 3-month study were similar, suggesting that the pulmonary inflammation was mediated by surface effects (Oberdörster *et al.*, 1994). The increased inflammogenic effect of nano- compared with submicron-sized particles has also been noted for carbon black particles instilled in rats, and, like TiO<sub>2</sub>, the inflammation correlated with the surface area dosimetric (Donaldson *et al.*, 2002). These shifts in dose–response could potentially require adjustment in threshold limit values for some nanoscale material.

As a rule, nanoscale particles are not necessarily more toxic than larger particles of the same material, as several studies contradict this trend. A study by Warheit *et al.* (2006b) demonstrated that intratracheal instillation of rats with 1 or 5 mg/kg of 300-nm pigment-grade TiO<sub>2</sub> particles, 200 nm × 35 nm TiO<sub>2</sub> rods, or 10-nm TiO<sub>2</sub> dots all resulted in equivalent pulmonary inflammation and tissue injury at 24-h postexposure. It is important to note that the pigment-grade particles used in the study were of rutile-type crystalline structure, while the rods and dots were anatase, so the crystalline nature of the material was not identical. The lack of an effect of TiO<sub>2</sub> particle size on toxicity has also been observed in cell culture studies; cytotoxic and inflammatory responses of human dermal fibroblasts and lung epithelial cells to TiO<sub>2</sub> nanoparticles correlated with the ability to generate reactive oxygen species (ROS) and were independent of particle size and surface area (Sayes *et al.*, 2006).

Recent studies suggest that surface properties, as opposed to size or surface area, are a more important determinant of particle biocompatibility (Warheit *et al.*, 2006a, 2007). A study by Warheit *et al.* (2006a) examined the inflammatory potency of four different quartz particles in rats, ranging in size from 12 to 500 nm. Pulmonary inflammation in this study was determined by inflammatory cell and enzyme profiles in bronchoalveolar lavage fluid, the degree of lung cell pro-

liferation, lung weight, and lung histopathology. Nanoparticle surface reactivity was measured by hemolytic potential and electron spin resonance. Inflammatory potency was best correlated not with particle size or surface area, but with surface reactivity as measured by hemolytic potential. In this study, the smallest, 12 nm, quartz particle was less inflammogenic on a mass basis than the largest, 500-nm particle. A previous study examining the inflammatory potency of micron-sized quartz particles in rats also found hemolytic potential to correlate well with *in vivo* inflammation (Clouter *et al.*, 2001).

The majority of animal studies assessing nanoparticle pulmonary toxicity to date have utilized the rat and intratracheal instillation, which may not be the most predictive model for human toxicity. Rats have been shown to more sensitive to nanoparticle-induced pulmonary sequela than other animal models (Bermudez *et al.*, 2004), and intratracheal instillation is nonphysiological, delivering nonrespirable aggregates and bypassing nasal deposition. Additionally, the doses utilized in many nanoparticle pulmonary toxicity studies were so high as to result in a condition termed “lung overload”. Lung overload results when pulmonary clearance mechanisms are overwhelmed, resulting in increased deposited alveolar lung burdens (ILSI, 2000). In rats, this condition can initiate a cycle of lung inflammation and fibrosis, culminating in tumor generation that appears to be species specific: it has not been observed in mice and hamsters, and most likely is not relevant to humans. For example, while chronic inhalation studies with microscale TiO<sub>2</sub> particles in rats have found treatment-related increases in lung tumors (Lee *et al.*, 1985), epidemiological studies addressing mortality risks in TiO<sub>2</sub> manufacturing workers have found no increase in risk of lung cancer or any other cause of mortality (Boffetta *et al.*, 2004). This discrepancy has been attributed to lung overload conditions in the animal studies.

There are several reasons to believe that nanoparticles may cause lung overload at lower administered doses: nanoparticles have increased alveolar deposition relative to larger particles, and, once deposited, nanoparticles may not be cleared as effectively as larger particles, since particle surface area has been shown to correlate with diminished alveolar macrophage clearance capacity (Moss and Wong, 2006). In support of this concept, nanoscale TiO<sub>2</sub> particles have been shown to cause tumors in rats at much lower exposure concentrations than micron-sized TiO<sub>2</sub> particles (Heinrich *et al.*, 1995; Lee *et al.*, 1985). This size-dependence of TiO<sub>2</sub> particle tumorigenicity was most likely due to increased nanoparticle lung burden, as these rat tumors were associated with particle lung overload (Lee *et al.*, 1985). This is an example of how adverse effects attributed to the nanoscale size of particles in some animal studies could be related to overload conditions, and may not be a consequence of size *per se*, but of increased deposited load for a given particle mass. It is important to clarify which animal studies resulted in lung overload conditions, and if these study findings are relevant to humans.

### Pulmonary Toxicity of Nanotubes

Nanoscale fibers, such as asbestos mineral fibers, have gained notoriety for causing pulmonary disease, including fibrosis and cancer, raising concerns that new, engineered nanofibers might behave similarly (Donaldson and Tran, 2004). For this reason, CNTs have received special attention with regard to their potential health risks. From classical fiber toxicology, the primary predictors of a fiber's pulmonary toxicity are biopersistence and length (Donaldson and Tran, 2004). The fiber length is important since long fibers are not as easily cleared by alveolar macrophage, resulting in prolonged pulmonary residence. Indeed, the 60-day lung residence of intratracheally instilled multiwalled CNTs in rats has been shown to be size dependent, with longer fibers having increased residence (Muller *et al.*, 2005). This prolonged residence of long CNTs within the lungs would tend to increase fiber–epithelium interactions, and these interactions may result in the development of inflammation through mechanisms such as the generation of oxidative stress and

cell membrane damage (Kagan *et al.*, 2006; Panessa-Warren *et al.*, 2006). Apart from its influence on lung residence, CNT fiber length has also been shown to directly correlate with induction of subcutaneous inflammation *in vivo* (Sato *et al.*, 2005).

Experimental studies in rodents have demonstrated that instillation of multiwalled and single-walled CNTs can cause pulmonary inflammation, granulomas, fibrosis, and even death (Table 1). The deaths observed in at least two of these studies were attributed to mechanical obstruction of the airways, and may not be meaningful due to the high doses administered (Carrero-Sanchez *et al.*, 2006; Warheit *et al.*, 2004). The observed epithelial granulomatous lesions were associated with agglomerated CNTs, and in some cases interstitial fibrosis was observed at the sites of the granulomatous lesions and at distant sites (Carrero-Sanchez *et al.*, 2006; Lam *et al.*, 2004; Muller *et al.*, 2005; Shvedova *et al.*, 2005; Warheit *et al.*, 2004). The fibrosis distant to the granulomatous lesions was presumed to be in response to either single or less-aggregated particles (Shvedova *et al.*, 2005). Though the induction of interstitial

TABLE 1  
CNT Acute Pulmonary Toxicology Studies

| Species    | Nanoparticle <sup>a</sup> | Administration route/study duration                     | Dose                   | Adverse effects/lesions                                                                                                                                                                                                                                | Ref.                                 |
|------------|---------------------------|---------------------------------------------------------|------------------------|--------------------------------------------------------------------------------------------------------------------------------------------------------------------------------------------------------------------------------------------------------|--------------------------------------|
| Mice       | MWCNT                     | Intratracheal instillation/1, 2, 3, 7 and 30 days       | 1, 2.5 and 5 mg/kg     | <ul style="list-style-type: none"> <li>• Dose-dependent lethality<sup>b</sup></li> <li>• Inflammation</li> <li>• Dose- and time-dependent fibrosis and granulomas</li> </ul>                                                                           | Carrero-Sanchez <i>et al.</i> , 2006 |
| Guinea pig | MWCNT                     | Intratracheal instillation/4 weeks                      | 25 mg/animal           | <ul style="list-style-type: none"> <li>• No evidence of inflammation</li> <li>• No perturbation of lung function</li> </ul>                                                                                                                            | Huczko <i>et al.</i> , 2001          |
| Guinea pig | MWCNT                     | Intratracheal instillation/90 days                      | 15 mg/animal           | <ul style="list-style-type: none"> <li>• Nonspecific desquamative interstitial pneumonia-like reaction</li> <li>• Increased lung resistance</li> </ul>                                                                                                 | Huczko <i>et al.</i> , 2005          |
| Mice       | SWCNT                     | Intratracheal instillation/7 and 90 days                | 0.1 and 0.5 mg/animal  | <ul style="list-style-type: none"> <li>• Deaths in high dose group</li> <li>• Progressive, dose-dependent multifocal epithelial granulomas</li> <li>• Interstitial inflammation</li> <li>• Peribronchial inflammation and necrosis</li> </ul>          | Lam <i>et al.</i> , 2004             |
| Rats       | MWCNT                     | Intratracheal instillation/1 and 2 mo                   | 0.5, 2 and 5 mg/animal | <ul style="list-style-type: none"> <li>• Inflammation and dose-dependent fibrosis</li> <li>• Bronchiolar granulomatous lesions</li> </ul>                                                                                                              | Muller <i>et al.</i> , 2005          |
| Mouse      | SWCNT                     | Pharyngeal aspiration/1, 3, 7, 28 and 60 days           | 40 µg/animal           | <ul style="list-style-type: none"> <li>• Transient inflammatory response</li> <li>• Dose-dependent epithelioid granulomas and interstitial fibrosis</li> <li>• Decreased bacterial clearance, and dose-dependent loss of pulmonary function</li> </ul> | Shvedova <i>et al.</i> , 2005        |
| Rats       | SWCNT                     | Intratracheal instillation/24 h, 1 week, 1 and 3 months | 1 and 5 mg/kg          | <ul style="list-style-type: none"> <li>• Deaths in high dose group<sup>b</sup></li> <li>• Transient inflammatory and cell injury responses</li> <li>• Nonprogressive, non-dose-dependent multifocal granulomas</li> </ul>                              | Warheit <i>et al.</i> , 2004         |

<sup>a</sup>MWCNT = multiwall carbon nanotube, SWCNT = single-wall carbon nanotube.

<sup>b</sup>Deaths were attributed to mechanical obstruction of upper airways by nanotube aggregates.



fibrosis and pulmonary granulomas in rodents has also been described for other manmade and natural fibers (Lemaire *et al.*, 1989), the rapid onset and lack of persistent inflammation associated with the CNT-induced fibrosis was atypical (Shvedova *et al.*, 2005). It is important to point out that in these studies, CNTs were administered by nonphysiological intratracheal inhalation or pharyngeal aspiration, and the nanotubes were at least partially in the form of aggregated, larger-diameter bundles (Thess *et al.*, 1996). Considering that a large portion of these aggregated CNTs would not have been respirable, the results of these studies are not necessarily representative of physiological inhalation exposures.

In two of the animal studies cited above, single-walled CNTs were compared to equal mass doses of nanoscale carbon black (Lam *et al.*, 2004; Shvedova *et al.*, 2005), and in both cases neither fibrotic nor granulomatous lesions were observed in the carbon black-treated animals. The lack of toxicity in the nanoscale carbon black-exposed animals in comparison with those treated with an equal mass of CNT, both carbon allotropes, highlights the importance of particle characteristics on toxicity. These effects appear to be primarily due to the surface properties and aspect ratio of CNTs, rather than their nanosize, *per se*. While CNTs clearly have the potential to cause adverse pulmonary effects, preliminary exposure assess-

ments predict low inhalation exposure, suggesting reduced overall risk (see exposure section above). Additionally, many of the intended applications of CNTs involve composite materials that would further reduce exposure to free nanotubes.

### Cutaneous Toxicity of Nanoparticles

As discussed above, a likely route of exposure to nanomaterials is by contact with the external surfaces of the body. Therefore, the potential hazards associated with cutaneous exposure to nanomaterials are of great concern. The limited *in vivo* studies that have been conducted to address the issue of cutaneous toxicity (Table 2), have identified only mild irritation as an adverse response to topical nanomaterial application. Nanoscale metal oxides, for example, are currently used in commercially available sunscreens, and have undergone extensive animal and clinical testing to fulfill regulatory requirements (SCCNFP, 2000, 2003). These studies found minimal irritancy potential, and no evidence of photo-irritation, sensitization, or photo-sensitization. The carbon-based nanomaterials, fullerene and CNT, similarly did not produce any notable irritant or allergic responses in clinical patch test or rabbit ocular toxicity studies (Huczko and Lange, 2001; Huczko *et al.*, 1999). This lack of irritancy for the CNT is

TABLE 2  
Cutaneous Toxicology Studies

| Species                                        | Nanoparticle <sup>a</sup>       | Study design/duration                                                                                  | Dose                        | Adverse effects/lesions                                                                                                                                               | Ref.                          |
|------------------------------------------------|---------------------------------|--------------------------------------------------------------------------------------------------------|-----------------------------|-----------------------------------------------------------------------------------------------------------------------------------------------------------------------|-------------------------------|
| Human                                          | CNT soot                        | Patch test/96 h                                                                                        | Unknown, aqueous suspension | • No irritation or signs of allergic response                                                                                                                         | Huczko and Lange, 2001        |
| Rabbit                                         | CNT soot                        | Ocular irritation (modified Draize test)/24, 48, and 72 h                                              | Unknown, aqueous suspension | • No irritation or signs of allergic response                                                                                                                         | Huczko and Lange, 2001        |
| Human                                          | Fullerene soot                  | Patch test/96 h                                                                                        | Unknown, aqueous suspension | • No irritation or signs of allergic response                                                                                                                         | Huczko <i>et al.</i> , 1999   |
| Rabbit                                         | Fullerene soot                  | Ocular irritation (modified Draize test)/24, 48 and 72 h                                               | Unknown, aqueous suspension | • No irritation or signs of allergic response                                                                                                                         | Huczko <i>et al.</i> , 1999   |
| Rat                                            | "Hat-stacked" carbon nanofibers | Subcutaneous implantation/1 and 4 weeks                                                                | Unknown                     | • Foreign body granuloma<br>• No tissue necrosis<br>• No severe inflammation                                                                                          | Yokoyama <i>et al.</i> , 2005 |
| Rat                                            | CNT                             | Subcutaneous implantation/1 and 4 weeks                                                                | 0.1 mg                      | • Foreign body granuloma<br>• No tissue necrosis<br>• No severe inflammation                                                                                          | Sato <i>et al.</i> , 2005     |
| Several studies—human, rabbits and guinea pigs | Nano-scale TiO <sub>2</sub>     | Skin and ocular irritation, sensitization, photo-irritation, photo-sensitization/<br>Various durations | Various doses               | • TiO <sub>2</sub> considered non-irritant to mild irritant in all studies<br>• No evidence of sensitization, photo-sensitization, or photo-irritation in any studies | SCCNFP, 2000                  |
| Several studies in humans                      | Nano-scale ZnO                  | Skin irritation, sensitization, photo-irritation, photo-sensitization/<br>various durations            | Various doses               | • ZnO considered non-irritant and non-photo-irritant<br>• No evidence of sensitization or photo-sensitization in any studies                                          | SCCNFP, 2003                  |

<sup>a</sup>CNT = carbon nanotube.

surprising, since irritant contact dermatitis has resulted from exposure to structurally similar carbon fibers (Eedy, 1996). In contrast to these benign findings following topical application, many of these nanomaterials have been found to be cytotoxic and proinflammatory to dermal cell lines *in vitro* (Manna *et al.*, 2005; Sayes *et al.*, 2005, 2006; Shvedova *et al.*, 2003). The discrepancy between the *in vitro* and *in vivo* findings may be due to limited dermal penetration *in vivo* (see exposure section above). In support of this posit, subcutaneous implantation of carbon nanotubes or “hat-stacked” carbon nanofibers in rats resulted in a more severe foreign body granuloma-like response (Sato *et al.*, 2005; Yokoyama *et al.*, 2005).

### Systemic Toxicity of Nanoparticles

Few studies have examined the systemic toxicity of nanomaterials, and most of these have been cursory acute toxicity studies (Table 3), often without identification of target organs and often with extremely limited characterization of the test material. This lack of characterization is an important point, since without characterization, it is impossible to compare studies and recognize parameters that influence toxicity (Fig. 3). Nevertheless, some general trends can be gleaned from these preliminary investigations. In the majority of the studies cited, the LD<sub>50</sub> values are in the high mg/kg–g/kg range regardless of administration route. This high mg/kg–g/kg range is defined as slightly toxic to moderately toxic for an oral LD<sub>50</sub>, based on the Hodge and Sterner classification (scale: extremely toxic = < 1 mg/kg; highly toxic = 1–50 mg/kg; moderately toxic = 50–500 mg/kg; slightly toxic = 500–5000 mg/kg; practically nontoxic = 5000–15,000 mg/kg; relatively harmless = > 15,000 mg/kg) (Hodge and Sterner, 1949). In many of the studies, the LD<sub>50</sub> could not even be estimated due to the lack of lethality observed at the doses administered.

It is interesting to note that many of the target organs that have been identified are members of the reticuloendothelial system (RES), including the liver and spleen. For example, acute toxicity studies of G3 cationic melamine dendrimers (Neerman *et al.*, 2004) and G7 cationic polyamidoamine dendrimers (Roberts *et al.*, 1996) in mice both determined that liver was most likely the primary target organ. This is not surprising, since it has been shown that nanoparticles are commonly taken up by the RES, presumably following opsonization (Ogawara *et al.*, 2001). Since nanoparticles used in biomedical applications are commonly coated in order to reduce opsonization and avoid the RES, the target organs for biomedical nanoparticles might be expected to shift away from the RES. Aside from the primary RES-related organs, the kidney also may be a common target organ of toxicity for nanoparticles. The kidney has been identified in preliminary pharmacokinetic studies as the primary clearance route for many nanoparticles, including CNTs, water-soluble polyalkyl-sulfonated fullerenes, and low-generation dendrimers (Chen *et al.*, 1998; Lee *et al.*, 2005; Wang *et al.*, 2004). Some

nanoparticles, such as dendrimers, have also been shown to distribute to kidney tissue (Nigavekar *et al.*, 2004; Roberts *et al.*, 1996). In one of the more comprehensive acute toxicology studies of nanoparticles in rats, the kidney was determined to be both the primary organ of clearance and the target organ of toxicity for polyalkylsulfonated fullerenes (Chen *et al.*, 1998). The necropsy performed at study termination identified a treatment-related lysosome-overload nephrosis.

Lysosomal disorders may be a common side effect of nanoparticle exposure, as some nanoparticles have properties of substances known to cause these conditions (Kovacs and Seglen, 1982; Schneider *et al.*, 1997), including lysosomal localization (Bottini *et al.*, 2006; Shukla *et al.*, 2005), enzyme-inhibiting ability (Shcharbin *et al.*, 2006; Ueng *et al.*, 1997), and biopersistence. Correspondingly, there are many examples of particle-induced lysosomal dysfunction. Studies have implicated changes in lysosomal permeability, and the subsequent release of lysosomal enzymes, as one of the mechanisms involved in the induction of apoptosis in alveolar macrophages by silica microparticles (Thibodeau *et al.*, 2004). Nanoscale neodymium oxide particles (Chen *et al.*, 2005), quantum dots (Seleverstov *et al.*, 2006), and fullerenes (Yamawaki and Iwai, 2006) have all been shown to induce autophagic activation *in vitro*. Though the lesions in the cited nano-copper (Chen *et al.*, 2006) and cationic dendrimer studies (Roberts *et al.*, 1996) in Table 3 were not identified as lysosomal pathologies, both copper (Myers *et al.*, 1993) and polycationic drugs (Mingeot-Leclercq *et al.*, 1988) are known to cause lysosomal disorders. Additionally, the histological features of the liver lesions in these studies (Table 3) are consistent with those associated with copper and cationic drug-induced lysosomal pathologies, i.e., steatosis (Cai *et al.*, 2005) and vacuolization (Anderson and Borlak, 2006). A thorough understanding of these potential mechanisms of nanoparticle toxicity is essential for hazard assessment and identification of exposure biomarkers.

### Carcinogenicity of Nanoparticles

Researchers have just begun examining the carcinogenic potential of engineered nanoparticles in various *in vitro* and *in vivo* systems. In a dermal carcinogenesis bioassay, topical treatment of 7,12-dimethylbenzanthracene preinitiated mouse skin with 200 µg fullerene in benzene, two times per week for 24 weeks, failed to generate tumors (Nelson *et al.*, 1993). These results agree with several *in vitro* findings; fullerene was found to be nonmutagenic in the Ames assay and nongenotoxic in a Chinese hamster lung cell chromosomal aberration assay, at concentrations up to 5 mg/ml (Mori *et al.*, 2006). Derivatized, water-soluble fullerenes have even been shown to possess antimutagenic properties (Babynin *et al.*, 2002). In contrast to these data, fullerenes were found to be mutagenic *in vitro* when irradiated with visible light in the presence of liver microsomes (Sera *et al.*, 1996). The mutagenicity of the

TABLE 3  
Acute Systemic Toxicology Studies

| Species | Nanoparticle                                             | Route      | LD <sub>50</sub> (g/kg)          | Adverse effects/lesions                                                                                                                                                                                | Ref.                                 |
|---------|----------------------------------------------------------|------------|----------------------------------|--------------------------------------------------------------------------------------------------------------------------------------------------------------------------------------------------------|--------------------------------------|
| Mouse   | Fullerene (C <sub>60</sub> )                             | ip         | > 2.5 <sup>a</sup>               | <ul style="list-style-type: none"> <li>• Fullerene was absorbed, localized in spleen and liver</li> <li>• No deaths observed</li> <li>• Liver-hypertrophy of the perisinusoidal cells</li> </ul>       | Moussa <i>et al.</i> , 1996          |
| Rat     | Fullerene (C <sub>60</sub> )                             | po         | > 2 <sup>a</sup>                 | <ul style="list-style-type: none"> <li>• No evidence of toxicity</li> <li>• No effect on body weight</li> </ul>                                                                                        | Mori <i>et al.</i> , 2006            |
| Mouse   | Multiwalled CNT                                          | po, ip     | > 0.005, > 0.005 <sup>a</sup>    | <ul style="list-style-type: none"> <li>• No evidence of toxicity</li> </ul>                                                                                                                            | Carrero-Sanchez <i>et al.</i> , 2006 |
| Mouse   | G7, cationic PAMAM dendrimer                             | ip         | > 0.045 <sup>b</sup>             | <ul style="list-style-type: none"> <li>• <b>Liver</b>, vacuolization</li> </ul>                                                                                                                        | Roberts <i>et al.</i> , 1996         |
| Mouse   | G3, cationic melamine dendrimer                          | ip         | 0.040–0.160                      | <ul style="list-style-type: none"> <li>• <b>Liver</b>, necrosis</li> </ul>                                                                                                                             | Neerman <i>et al.</i> , 2004         |
| Rat     | Polysulfonated fullerene (C <sub>60</sub> )              | ip         | 0.6                              | <ul style="list-style-type: none"> <li>• <b>Kidney</b>, lysosomal overload</li> </ul>                                                                                                                  | Chen <i>et al.</i> , 1998            |
| Mouse   | Polyhydroxylated fullerene (C <sub>60</sub> )            | ip         | 1.2                              | <ul style="list-style-type: none"> <li>• Dose-dependent increases in liver/body weight noted</li> </ul>                                                                                                | Ueng <i>et al.</i> , 1997            |
| Mouse   | 20 nm Fe <sub>3</sub> O <sub>4</sub>                     | po, ip, iv | > 2.1, > 1.6, > 0.4 <sup>a</sup> | <ul style="list-style-type: none"> <li>• No deaths observed</li> <li>• No histopathological lesions</li> </ul>                                                                                         | Xia <i>et al.</i> , 2005             |
| Mouse   | 58 nm Zn                                                 | po         | > 5 <sup>c</sup>                 | <ul style="list-style-type: none"> <li>• <b>Kidney</b>, tubular dilation, casts</li> <li>• <b>Liver</b>, hydropic degeneration</li> </ul>                                                              | Wang <i>et al.</i> , 2006            |
| Mouse   | 25 nm Cu                                                 | po         | 0.4                              | <ul style="list-style-type: none"> <li>• <b>Kidney</b>, proximal tubular necrosis</li> <li>• <b>Liver</b>, steatosis</li> <li>• <b>Spleen</b>, atrophy</li> </ul>                                      | Chen <i>et al.</i> , 2006            |
| Mouse   | 25, 80, and 155 nm TiO <sub>2</sub>                      | po         | > 5 <sup>a</sup>                 | <ul style="list-style-type: none"> <li>• <b>Kidney</b>, glomerular swelling</li> <li>• <b>Liver</b>, hydropic degeneration, spotty necrosis</li> </ul>                                                 | Wang <i>et al.</i> , 2007            |
| Rats    | Nanoscale TiO <sub>2</sub> T805 (primary particle 21 nm) | po         | > 2.2 <sup>a</sup>               | <ul style="list-style-type: none"> <li>• No evidence of toxicity</li> <li>• No gross lesions</li> <li>• No effect on body weight</li> </ul>                                                            | SCCNFP, 2000                         |
| Rats    | Nano-scale TiO <sub>2</sub>                              | Topical    | > 2 <sup>a</sup>                 | <ul style="list-style-type: none"> <li>• Hypokinesia, ataxia, chromodacryorrhea observed 24-h postdose</li> <li>• No deaths</li> <li>• No gross lesions</li> <li>• No effect on body weight</li> </ul> | SCCNFP, 2000                         |
| Rats    | CdTe quantum dots, 6 nm                                  | iv         | > 2 µmol/kg <sup>a</sup>         | <ul style="list-style-type: none"> <li>• No deaths</li> <li>• No histopathological lesions</li> <li>• No changes in clinical chemistry</li> </ul>                                                      | Zhang <i>et al.</i> , 2007           |

<sup>a</sup>No deaths were observed up to the maximum dose administered.

<sup>b</sup>1/5 of the animals in the high-dose group died.

<sup>c</sup>2/20 of the animals in the 5 g/kg-dose group died; deaths attributed to intestinal obstruction.

irradiated fullerenes appeared to be mediated by lipid peroxides produced by fullerene-generated singlet oxygen. Photo-dependent cytotoxicity has also been observed for fullerene and fullerene derivatives (Rancan *et al.* 2002; Sakai *et al.*, 1999; Yang *et al.*, 2002), and the underlying mechanism is also thought to involve ROS-mediated oxidative stress (Kamat *et al.*, 1998; Yamakoshi *et al.*, 2003).

Similar to the data for fullerenes, carcinogenicity data for nanoscale TiO<sub>2</sub> are also conflicting: *in vitro* studies with nanoscale TiO<sub>2</sub> have demonstrated photo-genotoxicity (Nakagawa *et al.*, 1997), while *in vivo* studies have shown protection against photo-induced carcinogenesis in mice (Bestak and Halliday, 1996). The genotoxicity of the nanoscale TiO<sub>2</sub> observed *in vitro* was dependent upon UV irradiation, and in the absence

of irradiation, TiO<sub>2</sub> was not genotoxic (Nakagawa *et al.*, 1997). Photo-dependent cytotoxicity of TiO<sub>2</sub> has also been demonstrated in human skin fibroblasts and colon carcinomas (Wamer *et al.*, 1997; Zhang and Sun, 2004). Since nanoscale TiO<sub>2</sub> particles, such as those used in commercial sunscreens, have been shown to generate ROS upon UV irradiation (Brezova *et al.*, 2005), oxidative stress is a plausible mechanism underlying this reported UV-dependent genotoxicity and cytotoxicity. It should be noted, however, that these findings of photo-toxicity and photo-genotoxicity were not supported by numerous industrial regulatory studies (SCCNFP, 2000). In any event, since coating of nanoscale TiO<sub>2</sub> particles has been shown to stabilize the particles and prevent photocatalysis (Allen *et al.*, 2005), the proper coating of commercial TiO<sub>2</sub> may eliminate any concerns over dermal carcinogenesis from topical application. Overall, while some *in vitro* studies support the carcinogenic potential of irradiated TiO<sub>2</sub> and fullerenes, the lack of carcinogenesis observed *in vivo* is more relevant and should be given more weight.

#### *Environmental Hazard of Nanoparticles*

Over the course of a nanomaterial's life cycle, from the initial production to final disposal, there are ample opportunities for interaction with the environment. Specific to nanomaterials are the concerns that, because of their chemistry, size, and possible nonbiodegradable composition, they will rapidly distribute throughout the environment and bioaccumulate, with unknown consequences. On the contrary, experimental data suggest that many nanomaterials have extremely low mobility because of their rapid absorption to surfaces (Lecoanet *et al.*, 2004). While some nanomaterials, such as metal oxides and carbon allotropes, may be biopersistent, many nanomaterials have been specifically developed to be biodegradable and are ideally suited for biological concepts, such as drug delivery. For example, drug delivery approaches have utilized poly( $\alpha$ -D,L-lactide-co-glycolide acid) and chitosan as biodegradable nanoparticle drug carriers (Cui *et al.*, 2006; Mitra *et al.*, 2001).

The possibility that nanoparticles' interactions with the environment will have deleterious effects has received considerable attention. Preliminary investigations seeking to address nanoparticle environmental concerns have primarily been limited to fullerenes. Fullerenes were reported to be toxic to bacteria (Lyon *et al.*, 2005) and aquatic species (Oberdörster, 2004), leading to speculation that nanomaterials may disrupt ecosystems (Feder, 2004). These results were later criticized due to the possibility that residual polar organic solvents used to disperse the fullerene influenced the results (Andrievsky *et al.*, 2005). Indeed, other studies examining fullerene antibacterial properties and the toxicity of fullerenes to the aquatic organism *Daphnia magna* found greater toxicity for fullerenes solubilized with organic solvents (Lovern and Klaper, 2006; Lyon *et al.*, 2006). The *D. magna* toxicity studies found a greater than 10-fold difference between the

LC<sub>50</sub> values of sonication-dispersed and THF-dispersed fullerenes (460 ppb vs. 7.9 ppm, respectively) (Lovern and Klaper, 2006), while the antibacterial study in *Bacillus subtilis* found a sixfold greater minimum inhibitory concentration for sonication-dispersed fullerenes. By contrast, fullerenes in their nondispersed, heavily aggregated state have been shown to be free of any bactericidal properties (Lyon *et al.*, 2005). As discussed in a previous section, clearly it is important to take experimental conditions into account when evaluating the potential hazard associated with a nanomaterial. It is also important to not attribute the properties of one nanomaterial to all; for each instance of a bactericidal nanoparticle, nanoparticles have been identified that do not possess this property (e.g., hydroxylated fullerenes) (Lyon *et al.*, 2005). Again, because nanomaterials differ greatly in their physicochemical properties, generalities with regard to their biocompatibility do not appear to be valid. The other side of the nanoparticle environmental issue is the potential direct benefit nanomaterials pose to the environment through pollution detection (Kim *et al.*, 2006) and reduction (Dong *et al.*, 2006; Sayle *et al.*, 2005), and bioremediation (Tungittiplakorn *et al.*, 2005). Further research is required to better characterize the fate of nanomaterials in the environment.

### SUMMARY

#### *No Two Nanomaterials are Exactly Alike*

Though there is admittedly limited toxicological data available at the present, no unique or characteristic toxicities of nanoscale materials have been identified. Furthermore, traditional methodologies for toxicity characterization appear to be adequate for nanoparticle safety assessment. With the possible exception of nanofibers, nanomaterials appear to behave more like the microscale or bulk material than like other, unrelated nanomaterials. Thus, it is likely that a nanoscale particle of a toxic material will be toxic, and, likewise, that the nanoscale particle of a nontoxic material will also be nontoxic. This in no way means that the hazard associated with the use of a novel nanoparticle can be fully estimated from its bulk counterpart, as changes in dose-response have been observed for some nanoscale materials. This uncertainty warrants the use of common-sense techniques, such as containment, ventilation, and the use of personal protective equipment, to minimize exposure until such time as safety can be established.

#### *Everything is Relative*

It is important to put the known hazards of engineered nanoparticles in perspective, by comparing the toxic potency of these nanomaterials with that of other "model" toxic agents. In other words, relatively speaking, how toxic are the most toxic nanomaterials that have been evaluated? Consider the case of



cancer therapeutics: the chemotherapeutic agents used to treat neoplastic disease are some of the most toxic drugs known (taxol, rat iv LD<sub>50</sub> = 8 mg/kg; Kim *et al.*, 2001). Nanoparticles, which have great potential as drug carriers to affect biodistribution of these chemotherapeutics and thereby decrease drug-related side effects, are sure to be less toxic than the drugs they carry. Compared with toxic agents currently used in domestic applications, such as insecticides used to treat the family dog (pyrethrins, dog iv LD<sub>50</sub> = 7 mg/kg; Soloway, 1976) or over-the-counter fungicides to treat dandruff (ketoconazole, man oral LD<sub>50</sub> = 45 mg/kg; Lewis *et al.*, 1984), the acute systemic toxicity studies identified in this review (Table 3) found nanoparticles to be significantly less toxic in the majority of cases. However, it can not be stressed enough that sparse safety data is available, and what is available consists primarily of acute studies, with chronic toxicology studies notably absent. An additional caveat is the noticeable lack of test material characterization that confounds study comparisons and conclusions regarding how hazard relates to nano-properties.

Some of the nanoparticle safety data discussed in this review, particularly that for CNT pulmonary toxicity, would suggest that researchers proceed with caution. This does not mean, however, that these nanomaterials should be abandoned outright, as risk is a combination of both the hazard and potential for exposure. There are many examples of dangerous materials that society has learned to work with safely, including ignitable fuels, such as gasoline, and radioactive isotopes used in nuclear energy and medicine. The insecticides and fungicides mentioned above are examples of hazardous substances that, with proper use, have low associated risk because the potential for exposure is low. At this time, the limited occupational and experimental studies available suggest that the potential for exposure to some engineered nanoparticles may be low, and supports the ability of the lung, GI tract, and skin to act as a significant barrier to the systemic translocation of many nanomaterials as well. However, further research is urgently needed to better clarify nanomaterial exposure and translocation pathways. On the other side of the risk equation is the fact that nanoparticle hazard appears to be modifiable. Several of the studies discussed in this review have highlighted the fact that by changing nanoparticle properties, such as surface characteristics, the biocompatibility of the particle can be dramatically altered. This “tunability” is unique, and holds the promise that with continued efforts to identify the factors involved in nanoparticle biocompatibility, safe engineered nanomaterials can be manufactured.

### Addressing Unknowns

Under the auspices of the National Nanotechnology Initiative (NNI), many efforts are underway to address the uncertainties regarding nanotechnology safety (NNI report, *Environmental, Health, and Safety Research Needs for*

*Engineered Nanoscale Materials*, September 2006). Examples include efforts by the National Institute of Standards and Technology (NIST) to standardize the methodology and instrumentation necessary for the characterization of nanomaterials, in order to aid in the implementation, interpretation, and interlaboratory comparison of safety studies. The National Cancer Institute has developed the Nanotechnology Characterization Laboratory to aid in the clinical translation of biomedical nanotechnology applications by identifying physicochemical properties that govern biocompatibility, and partnering with NIST and the U.S. Food and Drug Administration to help guide regulatory policy. Directly related to environmental and occupational concerns, the U.S. Environmental Protection Agency, the National Institute of Occupational Health, the National Institute of Environmental Health and Safety, and the National Toxicology Program are all actively involved in supporting research to define exposures, elucidate the hazards posed by nanomaterials throughout their environmental and occupational life cycle, and identify methods to ameliorate those hazards. These government agencies provide the checks and balances necessary to safeguard the public.

### There is No Life Without Risk

There are many unanswered questions when it comes to nanotechnology safety concerns: What properties govern the biocompatibility of nanomaterials? What is the fate of nanoparticles in the environment? What are realistic exposures? In other words, is nanotechnology safe? Although nanoparticle safety studies have not raised any red flags, because of the unknowns, it is impossible to say that nanotechnology is free of risk. However, the same could be said of any new material in the research pipeline, nano or otherwise, from the latest small-molecule drug to the next generation polymer. In the future, when weighing the established risks against the established benefits of nanotechnology, it may be important to consider the risks that we already take for granted in our everyday lives, like the gasoline in our automobiles or the flea collar on our dogs.

### FUNDING

National Cancer Institute, National Institutes of Health (N01-CO-12400).

### REFERENCES

- Allen, N. S., Edge, M., Sandoval, G., Verran, J., Stratton, J., and Maltby, J. (2005). Photocatalytic coatings for environmental applications. *Photochem. Photobiol.* **81**, 279–290.
- Alvarez-Roman, R., Naik, A., Kalia, Y. N., Guy, R. H., and Fessi, H. (2004). Skin penetration and distribution of polymeric nanoparticles. *J. Control. Release* **99**, 53–62.

- Anderson, N., and Borlak, J. (2006). Drug-induced phospholipidosis. *FEBS Lett.* **580**, 5533–5540.
- Andrievsky, G., Klochov, V., and Derevyanchenko, L. (2005). Is the C60 fullerene molecule toxic. *Fuller. Nanotub. Carbon Nanostruct.* **13**, 363–376.
- Babynin, E. V., Nuretdinov, I. A., Gubskaya, V. P., and Barabanshchikov, B. I. (2002). [Study of mutagenic activity of fullerene and some of its derivatives using His<sup>+</sup> reversions of Salmonella typhimurium as an example]. *Genetika* **38**, 453–457.
- Bailey, M. R. (1994). The new ICRP model for the respiratory tract. *Radiat. Prot. Dosimetry* **53**, 107–114.
- Bermudez, E., Mangum, J. B., Wong, B. A., Asgharian, B., Hext, P. M., Warheit, D. B., and Everitt, J. I. (2004). Pulmonary responses of mice, rats, and hamsters to subchronic inhalation of ultrafine titanium dioxide particles. *Toxicol. Sci.* **77**, 347–357.
- Baroli, B., Ennas, M. G., Loffredo, F., Isola, M., Pinna, R., and Lopez-Quintela, M. A. (2007). Penetration of metallic nanoparticles in human full-thickness skin. *J. Invest. Dermatol.* **127**, 1701–1712.
- Barregard, L., Sallsten, G., Gustafson, P., Andersson, L., Johansson, L., Basu, S., and Stigendal, L. (2006). Experimental exposure to wood-smoke particles in healthy humans: Effects on markers of inflammation, coagulation, and lipid peroxidation. *Inhal. Toxicol.* **18**, 845–853.
- Bestak, R., and Halliday, G. M. (1996). Sunscreens protect from UV-promoted squamous cell carcinoma in mice chronically irradiated with doses of UV radiation insufficient to cause edema. *Photochem. Photobiol.* **64**, 188–193.
- Boffetta, P., Soutar, A., Cherrie, J. W., Granath, F., Andersen, A., Anttila, A., Blettner, M., Gaborieau, V., Klug, S. J., Langard, S., et al. (2004). Mortality among workers employed in the titanium dioxide production industry in Europe. *Cancer Causes Control* **15**, 697–706.
- Bottini, M., Cerignoli, F., Dawson, M. I., Magrini, A., Rosato, N., and Mustelin, T. (2006). Full-length single-walled carbon nanotubes decorated with streptavidin-conjugated quantum dots as multivalent intracellular fluorescent nanoprobes. *Biomacromolecules* **7**, 2259–2263.
- Brezova, V., Gabcova, S., Dvoranova, D., and Stasko, A. (2005). Reactive oxygen species produced upon photoexcitation of sunscreens containing titanium dioxide (an EPR study). *J. Photochem. Photobiol. B* **79**, 121–134.
- Brown, J. S., Zeman, K. L., and Bennett, W. D. (2002). Ultrafine particle deposition and clearance in the healthy and obstructed lung. *Am. J. Respir. Crit. Care Med.* **166**, 1240–1247.
- Cai, L. J., Li, L., Cao, X. G., and Yin, G. Q. (2005). [Clinical characteristics and ultrastructural features of livers in children with Wilson disease manifested mainly as hepatic injuries]. *Zhonghua Gan Zang Bing Za Zhi* **13**, 919–922.
- Calderon-Garciduenas, L., Azzarelli, B., Acuna, H., Garcia, R., Gambling, T. M., Osnaya, N., Monroy, S., DEL Tizapantzi, M. R., Carson, J. L., Villarreal-Calderon, A., et al. (2002). Air pollution and brain damage. *Toxicol. Pathol.* **30**, 373–389.
- Carrero-Sanchez, J. C., Elias, A. L., Mancilla, R., Arrellin, G., Terrones, H., Laclette, J. P., and Terrones, M. (2006). Biocompatibility and toxicological studies of carbon nanotubes doped with nitrogen. *Nano Lett.* **6**, 1609–1616.
- Chang, M. C., Chow, J. C., Watson, J. G., Hopke, P. K., Yi, S. M., and England, G. C. (2004). Measurement of ultrafine particle size distributions from coal-, oil-, and gas-fired stationary combustion sources. *J. Air Waste Manag. Assoc.* **54**, 1494–1505.
- Chen, H. H., Yu, C., Ueng, T. H., Chen, S., Chen, B. J., Huang, K. J., and Chiang, L. Y. (1998). Acute and subacute toxicity study of water-soluble polyalkylsulfonated C60 in rats. *Toxicol. Pathol.* **26**, 143–151.
- Chen, Y., Yang, L., Feng, C., and Wen, L. P. (2005). Nano neodymium oxide induces massive vacuolization and autophagic cell death in non-small cell lung cancer NCI-H460 cells. *Biochem. Biophys. Res. Commun.* **337**, 52–60.
- Chen, Z., Meng, H., Xing, G., Chen, C., Zhao, Y., Jia, G., Wang, T., Yuan, H., Ye, C., Zhao, F., et al. (2006). Acute toxicological effects of copper nanoparticles in vivo. *Toxicol. Lett.* **163**, 109–120.
- Clouter, A., Brown, D., Hohr, D., Borm, P., and Donaldson, K. (2001). Inflammatory effects of respirable quartz collected in workplaces versus standard DQ12 quartz: particle surface correlates. *Toxicol. Sci.* **63**, 90–98.
- Cui, F., Shi, K., Zhang, L., Tao, A., and Kawashima, Y. (2006). Biodegradable nanoparticles loaded with insulin-phospholipid complex for oral delivery: Preparation, in vitro characterization and in vivo evaluation. *J. Control. Release* **114**, 242–250.
- Delfino, R. J., Sioutas, C., and Malik, S. (2005). Potential role of ultrafine particles in associations between airborne particle mass and cardiovascular health. *Environ. Health Perspect.* **113**, 934–946.
- de Lorenzo, A. J. (1970). The olfactory neuron and the blood-brain barrier. In *Taste and Smell in Vertebrates* (G. Wolstenholme and J. Knight, Eds.), pp. 151–176. London: J&A Churchill.
- Derfus, A. M., Chan, W. C. W., and Bhatia, S. N. (2004). Probing the cytotoxicity of semiconductor quantum dots. *Nano Lett.* **4**, 11–18.
- Dick, C. A., Brown, D. M., Donaldson, K., and Stone, V. (2003). The role of free radicals in the toxic and inflammatory effects of four different ultrafine particle types. *Inhal. Toxicol.* **15**, 39–52.
- Donaldson, K., Brown, D., Clouter, A., Duffin, R., MacNee, W., Renwick, L., Tran, L., and Stone, V. (2002). The pulmonary toxicology of ultrafine particles. *J. Aerosol Med.* **15**, 213–220.
- Donaldson, K., and Stone, V. (2003). Current hypotheses on the mechanisms of toxicity of ultrafine particles. *Ann. Ist. Super. Sanita* **39**, 405–410.
- Donaldson, K., Stone, V., Tran, C. L., Kreyling, W., and Borm, P. J. (2004). Nanotoxicology. *Occup. Environ. Med.* **61**, 727–728.
- Donaldson, K., and Tran, C. L. (2004). An introduction to the short-term toxicology of respirable industrial fibres. *Mutat. Res.* **553**, 5–9.
- Dong, Y., Bai, Z., Liu, R., Wang, X., Yan, H., and Zhu, T. (2006). Heterogeneous decomposition of indoor ammonia in a photoreactor with TiO<sub>2</sub>-finished cotton fabrics. *Environ. Technol.* **27**, 705–714.
- Eedy, D. J. (1996). Carbon-fibre-induced airborne irritant contact dermatitis. *Contact Dermatitis* **35**, 362–363.
- Elder, A., Gelein, R., Silva, V., Feikert, T., Opanashuk, L., Carter, J., Potter, R., Maynard, A., Ito, Y., Finkelstein, J., et al. (2006). Translocation of inhaled ultrafine manganese oxide particles to the central nervous system. *Environ. Health Perspect.* **114**, 1172–1178.
- Elder, A., and Oberdorster, G. (2006). Translocation and effects of ultrafine particles outside of the lung. *Clin. Occup. Environ. Med.* **5**, 785–796.
- Fang, G. C., Wu, Y. S., Wen, C. C., Lin, C. K., Huang, S. H., Rau, J. Y., and Lin, C. P. (2005). Concentrations of nano and related ambient air pollutants at a traffic sampling site. *Toxicol. Ind. Health* **21**, 259–271.
- Fechter, L. D., Johnson, D. L., and Lynch, R. A. (2002). The relationship of particle size to olfactory nerve uptake of a non-soluble form of manganese into brain. *Neurotoxicology* **23**, 177–183.
- Feder, B. J. (March 29, 2004). Study raises concerns about carbon particle. *New York Times*.
- Florence, A. T., and Hussain, N. (2001). Transcytosis of nanoparticle and dendrimer delivery systems: Evolving vistas. *Adv. Drug Deliv. Rev.* **50** (Suppl. 1), S69–S89.
- Gamer, A. O., Leibold, E., and van Ravenzwaay, B. (2006). The in vitro absorption of microfine zinc oxide and titanium dioxide through porcine skin. *Toxicol. In Vitro* **20**, 301–307.
- Garnett, M. C., and Kallinteri, P. (2006). Nanomedicines and nanotoxicology: Some physiological principles. *Occup. Med. (Lond.)* **56**, 307–311.
- Heinrich, U., Fuhst, R., Rittinghausen, S., Creutzenberg, O., Bellmann, B., Koch, W., and Levsen, K. (1995). Chronic inhalation exposure of Wistar rats

- and two different strains of mice to diesel exhaust, carbon black, and titanium dioxide. *Inhal. Toxicol.* **7**, 533–556.
- Hillyer, J. F., and Albrecht, R. M. (2001). Gastrointestinal persorption and tissue distribution of differently sized colloidal gold nanoparticles. *J. Pharm. Sci.* **90**, 1927–1936.
- Hodge, H. C., and Sterner, S. H. (1949). Tabulation of toxicity classes. *Am. Ind. Hyg. Assoc. Q.* **10**, 93–96.
- Huczko, A., and Lange, H. (2001). Carbon nanotubes: Experimental evidence for a null risk of skin irritation and allergy. *Fuller. Sci. Tech.* **9**, 247–250.
- Huczko, A., Lange, H., and Calko, E. (1999). Fullerenes: experimental evidence for a null risk of skin irritation and allergy. *Fuller. Sci. Tech.* **7**, 935–939.
- Huczko, A., Lange, H., Bystrzejewski, M., Baranowski, P., Grubek-Jaworska, H., Nejman, P., Przybylowski, T., Czuminiska, K., Glapinski, J., Walton, D. R. M., et al. (2005). Pulmonary toxicity of 1-D nanocarbon materials. *Fuller. Nanotub. Carbon Nanostruct.* **13**, 141–145.
- Huczko, A., Lange, H., Calko, E., Grubek-Jaworska, H., and Droszcz, P. (2001). Physiological testing of carbon nanotubes: Are they asbestos like? *Fuller. Sci. Tech.* **9**, 251–254.
- Hussain, N., Jaitley, V., and Florence, A. T. (2001). Recent advances in the understanding of uptake of microparticulates across the gastrointestinal lymphatics. *Adv. Drug Deliv. Rev.* **50**, 107–142.
- Hussain, S. M., Javorina, A. K., Schrand, A. M., Duhart, H. M., Ali, S. F., and Schlager, J. J. (2006). The interaction of manganese nanoparticles with PC-12 cells induces dopamine depletion. *Toxicol. Sci.* **92**, 456–463.
- ILSI (2000). The relevance of the rat lung response to particle overload for human risk assessment: A workshop consensus report. ILSI Risk Science Institute Workshop Participants. *Inhal. Toxicol.* **12**, 1–17.
- Jalava, P. I., Salonen, R. O., Pennanen, A. S., Sillanpaa, M., Halinen, A. I., Happonen, M. S., Hillamo, R., Brunekreef, B., Katsouyanni, K., Sunyer, J., et al. (2007). Heterogeneities in inflammatory and cytotoxic responses of RAW 264.7 macrophage cell line to urban air coarse, fine, and ultrafine particles from six European sampling campaigns. *Inhal. Toxicol.* **19**, 213–225.
- Jani, P., Halbert, G. W., Langridge, J., and Florence, A. T. (1989). The uptake and translocation of latex nanospheres and microspheres after oral administration to rats. *J. Pharm. Pharmacol.* **41**, 809–812.
- Jani, P., Halbert, G. W., Langridge, J., and Florence, A. T. (1990). Nanoparticle uptake by the rat gastrointestinal mucosa: Quantitation and particle size dependency. *J. Pharm. Pharmacol.* **42**, 821–826.
- Kagan, V. E., Tyurina, Y. Y., Tyurin, V. A., Konduru, N. V., Potapovich, A. I., Osipov, A. N., Kisin, E. R., Schwegler-Berry, D., Mercer, R., Castranova, V., et al. (2006). Direct and indirect effects of single walled carbon nanotubes on RAW 264.7 macrophages: Role of iron. *Toxicol. Lett.* **165**, 88–100.
- Kamat, J. P., Devasagayam, T. P., Priyadarsini, K. I., Mohan, H., and Mittal, J. P. (1998). Oxidative damage induced by the fullerene C60 on photosensitization in rat liver microsomes. *Chem. Biol. Interact.* **114**, 145–159.
- Kim, I. D., Rothschild, A., Lee, B. H., Kim, D. Y., Jo, S. M., and Tuller, H. L. (2006). Ultrasensitive chemiresistors based on electrospun TiO<sub>2</sub> nanofibers. *Nano Lett.* **6**, 2009–2013.
- Kim, S. C., Kim, D. W., Shim, Y. H., Bang, J. S., Oh, H. S., Wan Kim, S., and Seo, M. H. (2001). In vivo evaluation of polymeric micellar paclitaxel formulation: Toxicity and efficacy. *J. Control. Release* **72**, 191–202.
- Kovacs, A. L., and Seglen, P. O. (1982). Inhibition of hepatocytic protein degradation by inducers of autophagosome accumulation. *Acta Biol. Med. Ger.* **41**, 125–130.
- Kreyling, W. G., Semmler, M., Erbe, F., Mayer, P., Takenaka, S., Schulz, H., Oberdörster, G., and Ziesenis, A. (2002). Translocation of ultrafine insoluble iridium particles from lung epithelium to extrapulmonary organs is size dependent but very low. *J. Toxicol. Environ. Health Part A* **65**, 1513–1530.
- Kuhlbusch, T. A., Neumann, S., and Fissan, H. (2004). Number size distribution, mass concentration, and particle composition of PM<sub>1</sub>, PM<sub>2.5</sub>, and PM<sub>10</sub> in bag filling areas of carbon black production. *J. Occup. Environ. Hyg.* **1**, 660–671.
- Kukowska-Latallo, J. F., Candido, K. A., Cao, Z., Nigavekar, S. S., Majoros, I. J., Thomas, T. P., Balogh, L. P., Khan, M. K., and Baker, J. R., Jr. (2005). Nanoparticle targeting of anticancer drug improves therapeutic response in animal model of human epithelial cancer. *Cancer Res.* **65**, 5317–5324.
- Lademann, J., Weigmann, H., Rickmeyer, C., Barthelmes, H., Schaefer, H., Mueller, G., and Sterry, W. (1999). Penetration of titanium dioxide microparticles in a sunscreen formulation into the horny layer and the follicular orifice. *Skin Pharmacol. Appl. Skin Physiol.* **12**, 247–256.
- Lam, C. W., James, J. T., McCluskey, R., and Hunter, R. L. (2004). Pulmonary toxicity of single-wall carbon nanotubes in mice 7 and 90 days after intratracheal instillation. *Toxicol. Sci.* **77**, 126–134.
- Lecoanet, H. F., Bottero, J. Y., and Wiesner, M. R. (2004). Laboratory assessment of the mobility of nanomaterials in porous media. *Environ. Sci. Technol.* **38**, 5164–5169.
- Lee, C. C., MacKay, J. A., Frechet, J. M., and Szoka, F. C. (2005). Designing dendrimers for biological applications. *Nat. Biotechnol.* **23**, 1517–1526.
- Lee, K. P., Trochimowicz, H. J., and Reinhardt, C. F. (1985). Pulmonary response of rats exposed to titanium dioxide (TiO<sub>2</sub>) by inhalation for two years. *Toxicol. Appl. Pharmacol.* **79**, 179–192.
- Lemaire, I., Dionne, P. G., Nadeau, D., and Dunnigan, J. (1989). Rat lung reactivity to natural and man-made fibrous silicates following short-term exposure. *Environ. Res.* **48**, 193–210.
- Lewis, J. H., Zimmerman, H. J., Benson, G. D., and Ishak, K. G. (1984). Hepatic injury associated with ketoconazole therapy: Analysis of 33 cases. *Gastroenterology* **86**, 503–513.
- Li, N., Sioutas, C., Cho, A., Schmitz, D., Misra, C., Sempf, J., Wang, M., Oberley, T., Froines, J., and Nel, A. (2003). Ultrafine particulate pollutants induce oxidative stress and mitochondrial damage. *Environ. Health Perspect.* **111**, 455–460.
- Lomer, M. C., Thompson, R. P., and Powell, J. J. (2002). Fine and ultrafine particles of the diet: Influence on the mucosal immune response and association with Crohn's disease. *Proc. Nutr. Soc.* **61**, 123–130.
- Lovern, S. B., and Klaper, R. (2006). Daphnia magna mortality when exposed to titanium dioxide and fullerene (C60) nanoparticles. *Environ. Toxicol. Chem.* **25**, 1132–1137.
- Lv, H., Zhang, S., Wang, B., Cui, S., and Yan, J. (2006). Toxicity of cationic lipids and cationic polymers in gene delivery. *J. Control. Release* **114**, 100–109.
- Lyon, D. Y., Adams, L. K., Falkner, J. C., and Alvarez, P. J. (2006). Antibacterial activity of fullerene water suspensions: Effects of preparation method and particle size. *Environ. Sci. Technol.* **40**, 4360–4366.
- Lyon, D. Y., Fortner, J. D., Sayes, C. M., Colvin, V. L., and Hughe, J. B. (2005). Bacterial cell association and antimicrobial activity of a C60 water suspension. *Environ. Toxicol. Chem.* **24**, 2757–2762.
- Manna, S. K., Sarkar, S., Barr, J., Wise, K., Barrera, E. V., Jejelowo, O., Rice-Ficht, A. C., and Ramesh, G. T. (2005). Single-walled carbon nanotube induces oxidative stress and activates nuclear transcription factor- $\kappa$ B in human keratinocytes. *Nano Lett.* **5**, 1676–1684.
- Mavon, A., Miquel, C., Lejeune, O., Payre, B., and Moretto, P. (2007). In vitro percutaneous absorption and in vivo stratum corneum distribution of an organic and a mineral sunscreen. *Skin Pharmacol. Physiol.* **20**, 10–20.
- Maynard, A. D., Baron, P. A., Foley, M., Shvedova, A. A., Kisin, E. R., and Castranova, V. (2004). Exposure to carbon nanotube material: Aerosol



- release during the handling of unrefined single-walled carbon nanotube material. *J. Toxicol. Environ. Health Part A* **67**, 87–107.
- Mecke, A., Uppuluri, S., Sassanella, T. M., Lee, D. K., Ramamoorthy, A., Baker, J. R., Jr, Orr, B. G., and Banaszak Holl, M. M. (2004). Direct observation of lipid bilayer disruption by poly(amidoamine) dendrimers. *Chem. Phys. Lipids* **132**, 3–14.
- Mingeot-Leclercq, M. P., Laurent, G., and Tulkens, P. M. (1988). Biochemical mechanism of aminoglycoside-induced inhibition of phosphatidylcholine hydrolysis by lysosomal phospholipases. *Biochem. Pharmacol.* **37**, 591–599.
- Mitra, S., Gaur, U., Ghosh, P. C., and Maitra, A. N. (2001). Tumour targeted delivery of encapsulated dextran-doxorubicin conjugate using chitosan nanoparticles as carrier. *J. Control. Release* **74**, 317–323.
- Miyagawa, H., Misra, M., and Mohanty, A. K. (2005). Mechanical properties of carbon nanotubes and their polymer nanocomposites. *J. Nanosci. Nanotechnol.* **5**, 1593–1615.
- Mori, T., Takada, H., Ito, S., Matsubayashi, K., Miwa, N., and Sawaguchi, T. (2006). Preclinical studies on safety of fullerene upon acute oral administration and evaluation for no mutagenesis. *Toxicology* **225**, 48–54.
- Moss, O. R., and Wong, V. A. (2006). When nanoparticles get in the way: Impact of projected area on in vivo and in vitro macrophage function. *Inhal. Toxicol.* **18**, 711–716.
- Moussa, F., Trivin, F., Cèolin, R., Hadchouel, M., Sizaret, P. Y., Greugny, V., Fabre, C., Rassat, A., and Szwarc, H. (1996). Early effects of C-60 administration in Swiss mice: A preliminary account for in vivo C-60 toxicity. *Fuller. Sci. Technol.* **4**, 21–29.
- Muller, J., Huaux, F., Moreau, N., Misson, P., Heilier, J. F., Delos, M., Arras, M., Fonseca, A., Nagy, J. B., and Lison, D. (2005). Respiratory toxicity of multi-wall carbon nanotubes. *Toxicol. Appl. Pharmacol.* **207**, 221–231.
- Myers, B. M., Prendergast, F. G., Holman, R., Kuntz, S. M., and Larusso, N. F. (1993). Alterations in hepatocyte lysosomes in experimental hepatic copper overload in rats. *Gastroenterology* **105**, 1814–1823.
- Nakagawa, Y., Wakuri, S., Sakamoto, K., and Tanaka, N. (1997). The photogenotoxicity of titanium dioxide particles. *Mutat. Res.* **394**, 125–132.
- Neerman, M. F., Zhang, W., Parrish, A. R., and Simanek, E. E. (2004). In vitro and in vivo evaluation of a melamine dendrimer as a vehicle for drug delivery. *Int. J. Pharm.* **281**, 129–132.
- Nelson, M. A., Domann, F. E., Bowden, G. T., Hooser, S. B., Fernando, Q., and Carter, D. E. (1993). Effects of acute and subchronic exposure of topically applied fullerene extracts on the mouse skin. *Toxicol. Ind. Health* **9**, 623–630.
- Nigavekar, S. S., Sung, L. Y., Llanes, M., El-Jawahri, A., Lawrence, T. S., Becker, C. W., Balogh, L., and Khan, M. K. (2004). 3H dendrimer nanoparticle organ/tumor distribution. *Pharm. Res.* **21**, 476–483.
- Nikula, K. J., Avila, K. J., Griffith, W. C., and Mauderly, J. L. (1997). Lung tissue responses and sites of particle retention differ between rats and cynomolgus monkeys exposed chronically to diesel exhaust and coal dust. *Fundam. Appl. Toxicol.* **37**, 37–53.
- Nohynek, G. J., Lademann, J., Ribaud, C., and Roberts, M. S. (2007). Grey goo on the skin? Nanotechnology, cosmetic and sunscreen safety. *Crit. Rev. Toxicol.* **37**, 251–277.
- Oberdörster, E. (2004). Manufactured nanomaterials (fullerenes, C60) induce oxidative stress in the brain of juvenile largemouth bass. *Environ. Health Perspect.* **112**, 1058–1062.
- Oberdörster, G. (2000). Toxicology of ultrafine particles: In vivo studies. *Philos. Trans. R. Soc. Lond. A* **358**, 2719–2740.
- Oberdörster, G., Ferin, J., Gelein, R., Soderholm, S. C., and Finkelstein, J. (1992). Role of the alveolar macrophage in lung injury: Studies with ultrafine particles. *Environ. Health Perspect.* **97**, 193–199.
- Oberdörster, G., Ferin, J., and Lehnert, B. E. (1994). Correlation between particle size, in vivo particle persistence, and lung injury. *Environ. Health Perspect.* **102** (Suppl. 5), 173–179.
- Oberdörster, G., Oberdörster, E., and Oberdörster, J. (2005). Nanotoxicology: An emerging discipline evolving from studies of ultrafine particles. *Environ. Health Perspect.* **113**, 823–839.
- Oberdörster, G., Sharp, Z., Atudorei, V., Elder, A., Gelein, R., Kreyling, W., and Cox, C. (2004). Translocation of inhaled ultrafine particles to the brain. *Inhal. Toxicol.* **16**, 437–445.
- Oberdörster, G., Sharp, Z., Atudorei, V., Elder, A., Gelein, R., Lunts, A., Kreyling, W., and Cox, C. (2002). Extrapulmonary translocation of ultrafine carbon particles following whole-body inhalation exposure of rats. *J. Toxicol. Environ. Health Part A* **65**, 1531–1543.
- Ogawara, K., Furumoto, K., Takakura, Y., Hashida, M., Higaki, K., and Kimura, T. (2001). Surface hydrophobicity of particles is not necessarily the most important determinant in their in vivo disposition after intravenous administration in rats. *J. Control. Release* **77**, 191–198.
- Panessa-Warren, B. J., Warren, J. B., Wong, S. S., and Misewich, J. A. (2006). Biological cellular response to carbon nanoparticle toxicity. *J. Phys. Condens. Matter* **18**, S2185–S2201.
- Patri, A. K., Dobrovolskaia, M. A., Stern, S. T., and McNeil, S. E. (2007). Preclinical characterization of engineered nanoparticles intended for cancer therapeutics. In *Nanotechnology for Cancer Therapy* (M. M. Amiji, Ed.), pp. 105–137. New York: Taylor and Francis.
- Penttinen, P., Timonen, K. L., Tiittanen, P., Mirmé, A., Ruuskanen, J., and Pekkanen, J. (2001). Ultrafine particles in urban air and respiratory health among adult asthmatics. *Eur. Respir. J.* **17**, 428–435.
- Peters, A., Veronesi, B., Calderon-Garciduenas, L., Gehr, P., Chen, L. C., Geiser, M., Reed, W., Rothen-Rutishauser, B., Schurch, S., and Schulz, H. (2006a). Translocation and potential neurological effects of fine and ultrafine particles: A critical update. *Part. Fibre Toxicol.* **3**, 1–13.
- Peters, A., Wichmann, H. E., Tuch, T., Heinrich, J., and Heyder, J. (1997). Respiratory effects are associated with the number of ultrafine particles. *Am. J. Respir. Crit. Care Med.* **155**, 1376–1383.
- Peters, T. M., Heitbrink, W. A., Evans, D. E., Slavin, T. J., and Maynard, A. D. (2006b). The mapping of fine and ultrafine particle concentrations in an engine machining and assembly facility. *Ann. Occup. Hyg.* **50**, 249–257.
- Pflucker, F., Wendel, V., Hohenberg, H., Gartner, E., Will, T., Pfeiffer, S., Wepf, R., and Gers-Barlag, H. (2001). The human stratum corneum layer: An effective barrier against dermal uptake of different forms of topically applied micronised titanium dioxide. *Skin Pharmacol. Appl. Skin Physiol.* **14**, 92–97.
- Plattig, K. H. (1989). Electrophysiology of taste and smell. *Clin. Phys. Physiol. Meas.* **10**, 91–125.
- Preining, O. (1998). The physical nature of very, very small particles and its impact on their behavior. *J. Aerosol Sci.* **29**, 481–495.
- Radomski, A., Jurasz, P., Alonso-Escolano, D., Drews, M., Morandi, M., Malinski, T., and Radomski, M. W. (2005). Nanoparticle-induced platelet aggregation and vascular thrombosis. *Br. J. Pharmacol.* **146**, 882–893.
- Rancan, F., Rosan, S., Boehm, F., Cantrell, A., Brellreich, M., Schoenberger, H., Hirsch, A., and Moussa, F. (2002). Cytotoxicity and photocytotoxicity of a dendritic C(60) mono-adduct and a malonic acid C(60) tris-adduct on Jurkat cells. *J. Photochem. Photobiol. B Biol.* **67**, 157–162.
- Roberts, J. C., Bhalgat, M. K., and Zera, R. T. (1996). Preliminary biological evaluation of polyamidoamine (PAMAM) Starburst dendrimers. *J. Biomed. Mater. Res.* **30**, 53–65.
- Rouse, J. G., Yang, J., Ryman-Rasmussen, J. P., Barron, A. R., and Monteiro-Riviere, N. A. (2007). Effects of mechanical flexion on the penetration of fullerene amino acid-derivatized peptide nanoparticles through skin. *Nano Lett.* **7**, 155–160.



- Ryman-Rasmussen, J. P., Riviere, J. E., and Monteiro-Riviere, N. A. (2006). Penetration of intact skin by quantum dots with diverse physicochemical properties. *Toxicol. Sci.* **91**, 159–165.
- Ryman-Rasmussen, J. P., Riviere, J. E., and Monteiro-Riviere, N. A. (2007). Surface coatings determine cytotoxicity and irritation potential of quantum dot nanoparticles in epidermal keratinocytes. *J. Invest. Dermatol.* **1**, 143–153.
- Sakai, A., Yamakoshi, Y., and Miyata, N. (1999). Visible light irradiation of 60 fullerene causes killing and initiation of transformation in BALB/3T3 cells. *Fuller. Sci. Technol.* **7**, 743–756.
- Sato, Y., Yokoyama, A., Shibata, K., Akimoto, Y., Ogino, S., Nodasaka, Y., Kohgo, T., Tamura, K., Akasaka, T., Uo, M., *et al.* (2005). Influence of length on cytotoxicity of multi-walled carbon nanotubes against human acute monocytic leukemia cell line THP-1 in vitro and subcutaneous tissue of rats in vivo. *Mol. Biosyst.* **1**, 176–182.
- Sayes, C. M., Gobin, A. M., Ausman, K. D., Mendez, J., West, J. L., and Colvin, V. L. (2005). Nano-C60 cytotoxicity is due to lipid peroxidation. *Biomaterials* **26**, 7587–7595.
- Sayes, C. M., Wahi, R., Kurian, P. A., Liu, Y., West, J. L., Ausman, K. D., Warheit, D. B., and Colvin, V. L. (2006). Correlating nanoscale titania structure with toxicity: A cytotoxicity and inflammatory response study with human dermal fibroblasts and human lung epithelial cells. *Toxicol. Sci.* **92**, 174–185.
- Sayle, T. X., Parker, S. C., and Sayle, D. C. (2005). Oxidising CO to CO<sub>2</sub> using ceria nanoparticles. *Phys. Chem. Chem. Phys.* **7**, 2936–2941.
- Schneider, P., Korolenko, T. A., and Busch, U. (1997). A review of drug-induced lysosomal disorders of the liver in man and laboratory animals. *Microsc. Res. Tech.* **36**, 253–275.
- SCCNFP (2000). *Opinion of the Scientific Committee on Cosmetic Products and Non-food Products Intended for Consumers Concerning Titanium dioxide 24 October 2000*. European Commission, Brussels, Belgium. Available at: [http://ec.europa.eu/health/ph\\_risk/committees/sccp/sccp\\_opinions\\_en.htm](http://ec.europa.eu/health/ph_risk/committees/sccp/sccp_opinions_en.htm). Accessed July 9, 2007.
- SCCNFP (2003). *Opinion of the Scientific Committee on Cosmetic Products and Non-food Products Intended for Consumers Concerning Zinc oxide 24 June 2003*. European Commission, Brussels, Belgium. Available at: [http://ec.europa.eu/health/ph\\_risk/committees/sccp/sccp\\_opinions\\_en.htm](http://ec.europa.eu/health/ph_risk/committees/sccp/sccp_opinions_en.htm). Accessed July 9, 2007.
- Schulz, J., Hohenberg, H., Pflucker, F., Gartner, E., Will, T., Pfeiffer, S., Wepf, R., Wendel, V., Gers-Barlag, H., and Wittern, K. P. (2002). Distribution of sunscreens on skin. *Adv. Drug. Deliv. Rev.* **54**, S157–S163.
- Seleverstov, O., Zabimyk, O., Zscharnack, M., Bulavina, L., Nowicki, M., Heinrich, J. M., Yezhelyev, M., Emmrich, F., O'Regan, R., and Bader, A. (2006). Quantum dots for human mesenchymal stem cells labeling. A size-dependent autophagy activation. *Nano Lett.* **6**, 2826–2832.
- Sera, N., Tokiwa, H., and Miyata, N. (1996). Mutagenicity of the fullerene C60-generated singlet oxygen dependent formation of lipid peroxides. *Carcinogenesis* **17**, 2163–2169.
- Shcharbin, D., Jokiel, M., Klajnert, B., and Bryszewska, M. (2006). Effect of dendrimers on pure acetylcholinesterase activity and structure. *Bioelectrochemistry* **68**, 56–59.
- Shukla, R., Bansal, V., Chaudhary, M., Basu, A., Bhonde, R. R., and Sastry, M. (2005). Biocompatibility of gold nanoparticles and their endocytotic fate inside the cellular compartment: A microscopic overview. *Langmuir* **21**, 10644–10654.
- Shvedova, A. A., Castranova, V., Kisin, E. R., Schwegler-Berry, D., Murray, A. R., Gandelsman, V. Z., Maynard, A., and Baron, P. (2003). Exposure to carbon nanotube material: Assessment of nanotube cytotoxicity using human keratinocyte cells. *J. Toxicol. Environ. Health A* **66**, 1909–1926.
- Shvedova, A. A., Kisin, E. R., Mercer, R., Murray, A. R., Johnson, V. J., Potapovich, A. I., Tyurina, Y. Y., Gorelik, O., Arepalli, S., Schwegler-Berry, D., *et al.* (2005). Unusual inflammatory and fibrogenic pulmonary responses to single-walled carbon nanotubes in mice. *Am. J. Physiol. Lung Cell. Mol. Physiol.* **289**, L698–L708.
- Sioutas, C., Delfino, R. J., and Singh, M. (2005). Exposure assessment for atmospheric ultrafine particles (UFPs) and implications in epidemiologic research. *Environ. Health Perspect.* **113**, 947–955.
- Snyder, A., Wisner, T. W., and Johnson, D. C. (2006). Herpes simplex virus capsids are transported in neuronal axons without an envelope containing the viral glycoproteins. *J. Virol.* **80**, 11165–11177.
- Soloway, S. B. (1976). Naturally occurring insecticides. *Environ. Health Perspect.* **14**, 109–117.
- Thess, A., Lee, R., Nikolaev, P., Dai, H., Petit, P., Robert, J., Xu, C., Lee, Y. H., Kim, S. G., Rinzler, A. G., *et al.* (1996). Crystalline ropes of metallic carbon nanotubes. *Science* **273**, 483–487.
- Thibodeau, M. S., Giardina, C., Knecht, D. A., Helble, J., and Hubbard, A. K. (2004). Silica-induced apoptosis in mouse alveolar macrophages is initiated by lysosomal enzyme activity. *Toxicol. Sci.* **80**, 34–48.
- Thomas, T., Thomas, K., Sadrieh, N., Savage, N., Adair, P., and Bronaugh, R. (2006). Research strategies for safety evaluation of nanomaterials, part VII: Evaluating consumer exposure to nanoscale materials. *Toxicol. Sci.* **91**, 14–19.
- Tinkle, S. S., Antonini, J. M., Rich, B. A., Roberts, J. R., Salmen, R., DePree, K., and Adkins, E. J. (2003). Skin as a route of exposure and sensitization in chronic beryllium disease. *Environ. Health Perspect.* **111**, 1202–1208.
- Tirado-Miranda, M., Schmitt, A., Callejas-Fernandez, J., and Fernandez-Barbero, A. (2003). The aggregation behaviour of protein-coated particles: A light scattering study. *Eur. Biophys. J.* **32**, 128–136.
- Tungittiplakorn, W., Cohen, C., and Lion, L. W. (2005). Engineered polymeric nanoparticles for bioremediation of hydrophobic contaminants. *Environ. Sci. Technol.* **39**, 1354–1358.
- Ueng, T. H., Kang, J. J., Wang, H. W., Cheng, Y. W., and Chiang, L. Y. (1997). Suppression of microsomal cytochrome P450-dependent monooxygenases and mitochondrial oxidative phosphorylation by fullereneol, a polyhydroxylated fullerene C60. *Toxicol. Lett.* **93**, 29–37.
- Utell, M. J., and Frampton, M. W. (2000). Acute health effects of ambient air pollution: The ultrafine particle hypothesis. *J. Aerosol Med.* **13**, 355–359.
- Wamer, W. G., Yin, J. J., and Wei, R. R. (1997). Oxidative damage to nucleic acids photosensitized by titanium dioxide. *Free Radic. Biol. Med.* **23**, 851–858.
- Wang, B., Feng, W. Y., Wang, T. C., Jia, G., Wang, M., Shi, J. W., Zhang, F., Zhao, Y. L., and Chai, Z. F. (2006). Acute toxicity of nano- and micro-scale zinc powder in healthy adult mice. *Toxicol. Lett.* **161**, 115–123.
- Wang, H., Wang, J., Deng, X., Sun, H., Shi, Z., Gu, Z., Liu, Y., and Zhao, Y. (2004). Biodistribution of carbon single-wall carbon nanotubes in mice. *J. Nanosci. Nanotechnol.* **4**, 1019–1024.
- Wang, J., Zhou, G., Chen, C., Yu, H., Wang, T., Ma, Y., Jia, G., Gao, Y., Li, B., Sun, J., *et al.* (2007). Acute toxicity and biodistribution of different sized titanium dioxide particles in mice after oral administration. *Toxicol. Lett.* **168**, 176–185.
- Warheit, D. B., Laurence, B. R., Reed, K. L., Roach, D. H., Reynolds, G. A., and Webb, T. R. (2004). Comparative pulmonary toxicity assessment of single-wall carbon nanotubes in rats. *Toxicol. Sci.* **77**, 117–125.
- Warheit, D. B., Webb, T. R., Colvin, V. L., Reed, K. L., and Sayes, C. M. (2006a). Pulmonary bioassay studies with nanoscale and fine quartz particles in rats: Toxicity is not dependent upon particle size but on surface characteristics. *Toxicol. Sci.* **95**, 270–280.
- Warheit, D. B., Webb, T. R., Reed, K. L., Frerichs, S., and Sayes, C. M. (2007). Pulmonary toxicity study in rats with three forms of ultrafine-TiO<sub>2</sub> particles: Differential responses related to surface properties. *Toxicology* **230**, 90–104.

- Warheit, D. B., Webb, T. R., Sayes, C. M., Colvin, V. L., and Reed, K. L. (2006b). Pulmonary instillation studies with nanoscale TiO<sub>2</sub> rods and dots in rats: toxicity is not dependent upon particle size and surface area. *Toxicol. Sci.* **91**, 227–236.
- Weiss, R. (April 6, 2006). Nanotech product recalled in Germany. *Washington Post*.
- Wolinsky, H. (2006). Nanoregulation: A recent scare involving nanotech products reveals that the technology is not yet properly regulated. *EMBO Rep.* **7**, 858–861.
- Worle-Knirsch, J. M., Pulskamp, K., and Krug, H. F. (2006). Oops they did it again! Carbon nanotubes hoax scientists in viability assays. *Nano Lett.* **6**, 1261–8.
- Xia, T., Korge, P., Weiss, J. N., Li, N., Venkatesen, M. I., Sioutas, C., and Nel, A. (2004). Quinones and aromatic chemical compounds in particulate matter induce mitochondrial dysfunction: Implications for ultrafine particle toxicity. *Environ. Health Perspect.* **112**, 1347–1358.
- Xia, T., Kovochich, M., Brant, J., Hotze, M., Sempf, J., Oberley, T., Sioutas, C., Yeh, J. I., Wiesner, M. R., and Nel, A. E. (2006). Comparison of the abilities of ambient and manufactured nanoparticles to induce cellular toxicity according to an oxidative stress paradigm. *Nano Lett.* **6**, 1794–1807.
- Xia, Z., Wang, G., Tao, K., Li, J., and Tian, Y. (2005). Preparation and acute toxicology of nano-magnetic ferrofluid. *J. Huazhong Univ. Sci. Technolog. Med. Sci.* **25**, 59–61.
- Xiao, G. G., Wang, M., Li, N., Loo, J. A., and Nel, A. E. (2003). Use of proteomics to demonstrate a hierarchical oxidative stress response to diesel exhaust particle chemicals in a macrophage cell line. *J. Biol. Chem.* **278**, 50781–50790.
- Yamago, S., Tokuyama, H., Nakamura, E., Kikuchi, K., Kananishi, S., Sueki, K., Nakahara, H., Enomoto, S., and Ambe, F. (1995). In vivo biological behavior of a water-miscible fullerene: <sup>14</sup>C labeling, absorption, distribution, excretion and acute toxicity. *Chem. Biol.* **2**, 385–389.
- Yamakoshi, Y., Umezawa, N., Ryu, A., Arakane, K., Miyata, N., Goda, Y., Masumizu, T., and Nagano, T. (2003). Active oxygen species generated from photoexcited fullerene (C<sub>60</sub>) as potential medicines: O<sub>2</sub><sup>-</sup> versus <sup>1</sup>O<sub>2</sub>. *J. Am. Chem. Soc.* **125**, 12803–12809.
- Yamawaki, H., and Iwai, N. (2006). Cytotoxicity of water-soluble fullerene in vascular endothelial cells. *Am. J. Physiol. Cell Physiol.* **290**, C1495–C1502.
- Yang, X. L., Fan, C. H., and Zhu, H. S. (2002). Photo-induced cytotoxicity of malonic acid [C(60)]fullerene derivatives and its mechanism. *Toxicol. In Vitro* **16**, 41–46.
- Yokoyama, A., Sato, Y., Nodasaka, Y., Yamamoto, S., Kawasaki, T., Shindoh, M., Kohgo, T., Akasaka, T., Uo, M., Watari, F., et al. (2005). Biological behavior of hat-stacked carbon nanofibers in the subcutaneous tissue in rats. *Nano Lett.* **5**, 157–161.
- Zhang, A. P., and Sun, Y. P. (2004). Photocatalytic killing effect of TiO<sub>2</sub> nanoparticles on Ls-174-t human colon carcinoma cells. *World J. Gastroenterol.* **10**, 3191–3193.
- Zhang, Y., Chen, W., Zhang, J., Liu, J., Chen, G., and Pope, C. (2007). In vitro and in vivo toxicity of CdTe nanoparticles. *J. Nanosci. Nanotechnol.* **7**, 497–503.
- Zhu, S., Oberdörster, E., and Haasch, M. L. (2006). Toxicity of an engineered nanoparticle (fullerene, C<sub>60</sub>) in two aquatic species, *Daphnia* and fathead minnow. *Mar. Environ. Res.* **62**, S5–S9.
